# Supplementary material for: Synthesis of phenothiazines from cyclohexanones and 2-aminobenzenethiols under transition-metal-free conditions
Source: Royal Society of Chemistry journal article supplement (doi:10.1039/c3ra43989e), 2013-01-01
Supplement: c3ra43989e.pdf [file c3ra43989e.pdf]

## Supporting information for

# Synthesis of phenothiazines from cyclohexanones and 2-aminobenzenethiols under transition-metal-free conditions

Yunfeng Liao,<sup>a</sup> Pengcheng Jiang,<sup>a</sup> Shanping Chen,<sup>a</sup> Fuhong Xiao,<sup>a</sup> Guo-Jun Deng<sup>a,b,\*</sup>

<sup>a</sup> Key Laboratory of Environmentally Friendly Chemistry and Application of Ministry of Education, College of Chemistry, Xiangtan University, Xiangtan 411105, China; e-mail: gjdeng@xtu.edu.cn;

<sup>b</sup> Key Laboratory of Molecular Recognition and Function, Institute of Chemistry, Chinese Academy of Sciences, Beijing 100080, China.

### Table of Contents

|                                                                                  |                |
|----------------------------------------------------------------------------------|----------------|
| <b>1. General information</b>                                                    | <b>S2</b>      |
| <b>2. General procedure</b>                                                      | <b>S2</b>      |
| <b>3. Characterization data of products</b>                                      | <b>S2-S10</b>  |
| <b>4. References</b>                                                             | <b>S10-S11</b> |
| <b>5. Copies of <sup>1</sup>H and <sup>13</sup>C NMR spectra of all products</b> | <b>S12-S29</b> |
| <b>6. GC for 3h and 3h'</b>                                                      | <b>S30</b>     |

### General information:

All reactions were carried out under an atmosphere of oxygen unless otherwise noted. Flash chromatography was performed on neutral aluminum oxide (100-200 mesh).  $^1\text{H}$  NMR and  $^{13}\text{C}$  NMR spectra were recorded on Bruker-AV (400 and 100 MHz, respectively) instrument internally referenced to tetramethylsilane (TMS) or acetone signals. Mass spectra was measured on an Agilent 5975 GC-MS instrument (EI). The new compounds were characterized by  $^1\text{H}$  NMR,  $^{13}\text{C}$  NMR, MS and HRMS. The structure of known compounds were further corroborated by comparing their  $^1\text{H}$  NMR,  $^{13}\text{C}$  NMR data and MS data with those of literature. All reagents were obtained from commercial suppliers and used without further purification.

### General procedure (for 0.2 mmol scale):

Potassium iodide (3.4 mg, 0.02 mmol), (benzylsulfonyl)benzene (**A-1**, 4.6 mg, 0.02 mmol) were added to a 10 mL reaction tube. The sealed tube was purged with oxygen for three times and was added 2-aminobenzenethiol (**1a**, 21.4  $\mu\text{L}$ , 0.2 mmol), cyclohexanone (**2a**, 31  $\mu\text{L}$ , 0.3 mmol) and chlorobenzene (0.8 mL) by syringe. The reaction vessel was stirred at 140  $^\circ\text{C}$  for 24 h. After cooling to room temperature, the volatiles were removed under reduced pressure. The residue was purified by column chromatography on neutral aluminum oxide (petroleum ether/EtOAc = 20:1) to afford the desired product **3a** as pale yellow solid (28.3 mg, 71% yield).

### General procedure (for 0.5 mmol scale):

Potassium iodide (8.3 mg, 0.05 mmol), (benzylsulfonyl)benzene (**A-1**, 11.5 mg, 0.05 mmol) were added to a 10 mL reaction tube. The sealed tube was purged with oxygen for three times and was added 2-aminobenzenethiol (**1a**, 53.3  $\mu\text{L}$ , 0.5 mmol), cyclohexanone (**2a**, 77.5  $\mu\text{L}$ , 0.75 mmol) and chlorobenzene (2.0 mL) by syringe. The reaction vessel was stirred at 140  $^\circ\text{C}$ . After 4 h, 8 h and 12 h, the reaction tube was flushed with oxygen and the reaction mixture was stirred for 24 h. After cooling to room temperature, the volatiles were removed under reduced pressure. The residue was purified by column chromatography on neutral aluminum oxide (petroleum ether/EtOAc = 20:1) to give the desired product **3a** as pale yellow solid (70 mg, 70% yield).

**10H-Phenothiazine (3a, CAS: 92-84-2)**<sup>[1]</sup>

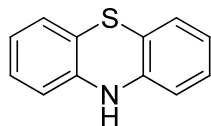

$^1\text{H}$  NMR (400 MHz,  $\text{CD}_3\text{COCD}_3$ , ppm)  $\delta$  7.82 (brs, 1H), 7.00-6.93 (m, 4H), 6.79 (t,  $J = 7.0$  Hz, 2H), 6.71 (d,  $J = 8.0$  Hz, 2H);  $^{13}\text{C}$  NMR (100 MHz,  $\text{CD}_3\text{COCD}_3$ , ppm)  $\delta$  143.6, 128.5, 127.4, 123.1, 118.6, 115.6; MS (EI)  $m/z$  (%) 199 (100), 167, 154, 140, 77.

**3-Methyl-10H-phenothiazine (3b, CAS: 3939-47-7)**<sup>[2]</sup>

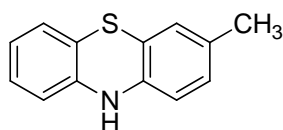

The reaction was conducted with 2-aminobenzenethiol (**1a**, 21.3  $\mu\text{L}$ , 0.2 mmol) and 4-methylcyclohexanone (**2b**, 36.8  $\mu\text{L}$ , 0.3 mmol). The residue was purified by column chromatography on neutral aluminum oxide (petroleum ether/EtOAc = 20:1) to give **3b** as yellow solid (35.4 mg, 83%).  $^1\text{H}$  NMR (400 MHz,  $\text{CD}_3\text{COCD}_3$ , ppm)  $\delta$  7.74 (brs, 1H), 6.97-6.93 (m, 2H), 6.77-6.60 (m, 5H), 2.16 (s, 3H);  $^{13}\text{C}$  NMR (100 MHz,  $\text{CD}_3\text{COCD}_3$ , ppm)  $\delta$  143.8, 143.8, 141.0, 141.0, 132.3, 128.9, 128.3, 127.6, 127.3, 122.7, 118.3, 115.4, 20.5; MS (EI)  $m/z$  (%) 213 (100), 198, 180, 167, 90.

**3-Ethyl-10H-phenothiazine (3c, CAS: 54027-87-1)**<sup>[3]</sup>

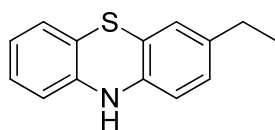

The reaction was conducted with 2-aminobenzenethiol (**1a**, 21.3  $\mu\text{L}$ , 0.2 mmol) and 4-ethylcyclohexanone (**2c**, 42.3  $\mu\text{L}$ , 0.3 mmol). The residue was purified by column chromatography on neutral aluminum oxide (petroleum ether/EtOAc = 50:1) to give **3c** as yellow solid (34.5 mg, 76%).  $^1\text{H}$  NMR (400 MHz,  $\text{CD}_3\text{COCD}_3$ , ppm)  $\delta$  7.76 (brs, 1H), 6.95 (t,  $J = 5.8$  Hz, 2H), 6.84-6.63 (m, 5H), 2.47 (m, 2H), 1.14 (m, 3H);  $^{13}\text{C}$  NMR (100 MHz,  $\text{CD}_3\text{COCD}_3$ , ppm)  $\delta$  143.8, 141.2, 139.1, 128.3, 127.8, 127.3, 126.6, 122.7, 118.5, 118.4, 115.5, 115.4, 28.6, 16.3; MS (EI)  $m/z$  (%) 227, 212 (100), 180, 167, 106.

**3-Pentyl-10H-phenothiazine (3d, CAS: 93730-07-5)**<sup>[3]</sup>

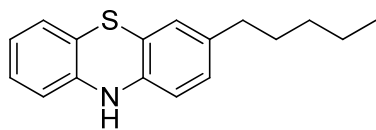

The reaction was conducted with 2-aminobenzenethiol (**1a**, 21.3  $\mu\text{L}$ , 0.2 mmol) and 4-pentylcyclohexanone (**2d**, 57.0  $\mu\text{L}$ , 0.3 mmol). The residue was purified by column chromatography on neutral aluminum oxide (petroleum ether/EtOAc = 50:1) to give **3d** as yellow solid (37.8 mg, 70%).  $^1\text{H}$  NMR (400 MHz,  $\text{CD}_3\text{COCD}_3$ , ppm)  $\delta$  7.76 (brs, 1H), 6.98-6.93 (m, 2H), 6.84-6.63 (m, 5H), 2.45 (m, 2H), 1.54 (m, 2H), 1.30 (m, 4H), 0.88 (m, 3H);  $^{13}\text{C}$  NMR (100 MHz,  $\text{CD}_3\text{COCD}_3$ , ppm)  $\delta$  143.8, 141.2, 137.6, 128.3, 127.3, 127.1, 127.0, 122.7, 118.5, 118.3, 115.9, 115.4, 35.6, 32.2, 32.1, 23.3, 14.5; MS (EI)  $m/z$  (%) 269, 212 (100), 180, 167, 152.

**3-tert-Pentyl-10H-phenothiazine (3e)**

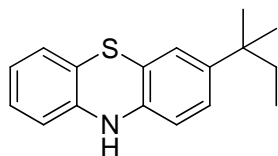

The reaction was conducted with 2-aminobenzenethiol (**1a**, 21.3  $\mu\text{L}$ , 0.2 mmol) and 4-(tert-pentyl)cyclohexanone (**2e**, 54.9  $\mu\text{L}$ , 0.3 mmol). The residue was purified by column chromatography on neutral aluminum oxide (petroleum ether/EtOAc = 20:1) to give **3e** as yellow solid (43.0 mg, 80%).  $^1\text{H}$  NMR (400 MHz,  $\text{CD}_3\text{COCD}_3$ , ppm)  $\delta$  7.77 (brs, 1H), 6.97-6.93 (m, 4H), 6.78-6.66 (m, 3H), 1.59 (m, 2H), 1.21 (s, 6H), 0.66 (m, 3H);  $^{13}\text{C}$  NMR (100 MHz,  $\text{CD}_3\text{COCD}_3$ , ppm)  $\delta$  144.2, 143.8, 140.9, 128.3, 127.3, 126.0, 124.8, 122.7, 118.6, 118.0, 115.4, 115.1, 38.1, 37.4, 28.9, 9.6; HRMS (ESI,  $m/z$ ): calcd for  $\text{C}_{17}\text{H}_{19}\text{NS}$   $[\text{M}]^+$  269.1233, found 269.1232.

**3-Phenyl-10H-phenothiazine (3f, CAS: 4018-68-2)**<sup>[4]</sup>

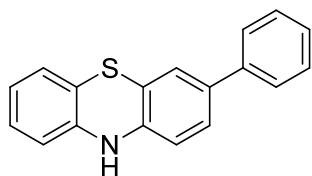

The reaction was conducted with 2-aminobenzenethiol (**1a**, 21.3  $\mu\text{L}$ , 0.2 mmol) and 4-phenylcyclohexanone (**2f**, 52.2 mg, 0.3 mmol). The residue was purified by column

chromatography on neutral aluminum oxide (petroleum ether/EtOAc = 20:1) to give **3f** as yellow solid (44.6 mg, 81%). <sup>1</sup>H NMR (400 MHz, CD<sub>3</sub>COCD<sub>3</sub>, ppm) δ 7.97 (brs, 1H), 7.58 (d, *J* = 6.4 Hz, 2H), 7.41-7.25 (m, 5H), 6.99 (t, *J* = 8.2 Hz, 2H), 6.81-6.73 (m, 3H); <sup>13</sup>C NMR (100 MHz, CD<sub>3</sub>COCD<sub>3</sub>, ppm) δ 143.2, 142.8, 141.1, 136.1, 129.8, 128.5, 127.9, 127.8, 127.4, 127.1, 125.6, 123.2, 119.2, 118.3, 115.9, 115.7; MS (EI) *m/z* (%) 275 (100), 243, 152, 114, 77.

### Ethyl 10*H*-phenothiazine-3-carboxylate (**3g**)

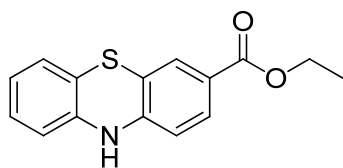

The reaction was conducted with 2-aminobenzenethiol (**1a**, 21.3 μL, 0.2 mmol) and ethyl 4-oxocyclohexanecarboxylate (**2g**, 47.8 μL, 0.3 mmol). The residue was purified by column chromatography on neutral aluminum oxide (petroleum ether/EtOAc = 20:1) to give **3g** as yellow solid (39.0 mg, 72%). <sup>1</sup>H NMR (400 MHz, CD<sub>3</sub>COCD<sub>3</sub>, ppm) δ 8.30 (brs, 1H), 7.62 (d, *J* = 7.6 Hz, 1H), 7.52 (s, 1H), 7.01 (d, *J* = 6.8 Hz, 1H), 6.95 (d, *J* = 6.8 Hz, 1H), 6.85 (d, *J* = 6.8 Hz, 1H), 6.73 (d, *J* = 6.8 Hz, 2H), 4.27 (m, 2H), 1.33 (t, *J* = 6.2 Hz, 3H); <sup>13</sup>C NMR (100 MHz, CD<sub>3</sub>COCD<sub>3</sub>, ppm) δ 166.1, 147.4, 147.4, 141.8, 130.4, 128.7, 128.4, 127.4, 125.1, 124.0, 117.9, 116.0, 114.8, 61.3, 14.8; HRMS (ESI, *m/z*): calcd for C<sub>15</sub>H<sub>13</sub>NO<sub>2</sub>S [M]<sup>+</sup> 271.0662, found 271.0660.

### 2-Methyl-10*H*-phenothiazine (**3j**, CAS: 5828-51-3)<sup>[1]</sup>

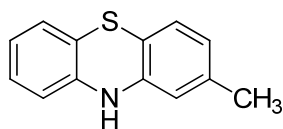

The reaction was conducted with 2-aminobenzenethiol (**1a**, 21.3 μL, 0.2 mmol) and 3-methylcyclohex-2-enone (**2j**, 34.0 μL, 0.3 mmol). The residue was purified by column chromatography on neutral aluminum oxide (petroleum ether/EtOAc = 20:1) to give **3j** as yellow solid (22.2 mg, 52%). <sup>1</sup>H NMR (400 MHz, CD<sub>3</sub>COCD<sub>3</sub>, ppm) δ 7.76 (brs, 1H), 6.98-6.93 (m, 2H), 6.83-6.78 (m, 2H), 6.71 (d, *J* = 7.6 Hz, 1H), 6.63 (d, *J* = 6.8 Hz, 1H), 6.55 (s, 1H), 2.17 (s, 3H); <sup>13</sup>C NMR (100 MHz, CD<sub>3</sub>COCD<sub>3</sub>, ppm) δ 143.6, 143.4, 138.3, 128.3, 127.3, 127.1, 123.8, 122.9, 118.9, 116.4, 115.6, 115.2, 21.2; MS (EI) *m/z* (%) 213 (100), 198, 180, 167, 152.

**3-Methyl-10H-phenothiazine (3k, CAS: 3939-47-7)**<sup>[2]</sup>

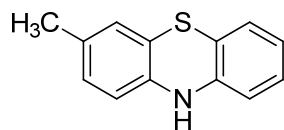

The reaction was conducted with 2-amino-5-methylbenzenethiol (**1b**, 27.8 mg, 0.2 mmol) and cyclohexanone (**2a**, 31.0  $\mu$ L, 0.3 mmol). The residue was purified by column chromatography on neutral aluminum oxide (petroleum ether/EtOAc = 20:1) to give **3k** as yellow solid (26.4 mg, 62%). This product is same as **3b**. <sup>1</sup>H NMR (400 MHz, CD<sub>3</sub>COCD<sub>3</sub>, ppm)  $\delta$  7.74 (brs, 1H), 6.97-6.93 (m, 2H), 6.77-6.60 (m, 5H), 2.16 (s, 3H); <sup>13</sup>C NMR (100 MHz, CD<sub>3</sub>COCD<sub>3</sub>, ppm)  $\delta$  143.8, 143.8, 141.0, 141.0, 132.3, 128.9, 128.3, 127.6, 127.3, 122.7, 118.3, 115.4, 20.5; MS (EI) *m/z* (%) 213 (100), 198, 180, 167, 90.

**3-Methoxy-10H-phenothiazine (3l, CAS: 1771-19-3)**<sup>[1]</sup>

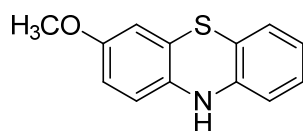

The reaction was conducted with 2-amino-5-methoxybenzenethiol (**1c**, 31.1 mg, 0.2 mmol) and cyclohexanone (**2a**, 31.0  $\mu$ L, 0.3 mmol). The residue was purified by column chromatography on neutral aluminum oxide (petroleum ether/EtOAc = 10:1) to give **3l** as white solid (26.6 mg, 58%). <sup>1</sup>H NMR (400 MHz, CD<sub>3</sub>COCD<sub>3</sub>, ppm)  $\delta$  7.65 (brs, 1H), 6.98-6.94 (m, 2H), 6.78-6.59 (m, 5H), 3.71 (s, 3H); <sup>13</sup>C NMR (100 MHz, CD<sub>3</sub>COCD<sub>3</sub>, ppm)  $\delta$  156.6, 144.2, 137.0, 128.5, 127.3, 122.6, 119.7, 118.0, 116.2, 115.4, 114.0, 112.8, 56.1; MS (EI) *m/z* (%) 229 (100), 214, 186, 154, 128.

**3-Fluoro-10H-phenothiazine (3m, CAS: 397-59-1)**<sup>[5]</sup>

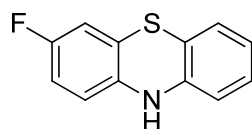

The reaction was conducted with 2-amino-5-fluorobenzenethiol (**1d**, 28.6 mg, 0.2 mmol) and cyclohexanone (**2a**, 31.0  $\mu$ L, 0.3 mmol). The residue was purified by column chromatography on neutral aluminum oxide (petroleum ether/EtOAc = 50:1) to give **3m** as white solid (33.0 mg, 76%). <sup>1</sup>H NMR (400 MHz, CD<sub>3</sub>COCD<sub>3</sub>, ppm)  $\delta$  7.90 (brs, 1H), 7.01-6.97 (m, 2H), 6.81-6.73 (m, 5H);

$^{13}\text{C}$  NMR (100 MHz,  $\text{CD}_3\text{COCD}_3$ , ppm)  $\delta$  159.4 (d,  $J = 237.1$  Hz), 143.6, 140.0, 128.8, 127.4, 123.2, 120.5 (d,  $J = 6.8$  Hz), 117.5, 116.1 (d,  $J = 8.0$  Hz), 115.6, 114.6 (d,  $J = 22.6$  Hz), 114.0 (d,  $J = 25.1$  Hz); MS (EI)  $m/z$  (%) 217 (100), 185, 172, 157, 91.

**3-Chloro-10H-phenothiazine (3n, CAS: 1207-99-4)**<sup>[4]</sup>

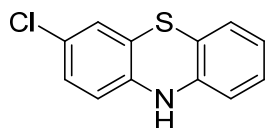

The reaction was conducted with 2-amino-5-chlorobenzenethiol (**1e**, 31.9 mg, 0.2 mmol) and cyclohexanone (**2a**, 31.0  $\mu\text{L}$ , 0.3 mmol). The residue was purified by column chromatography on neutral aluminum oxide (petroleum ether/EtOAc = 20:1) to give **3n** as yellow solid (35.0 mg, 75%).  $^1\text{H}$  NMR (400 MHz,  $\text{CD}_3\text{COCD}_3$ , ppm)  $\delta$  7.99 (brs, 1H), 7.01-6.95 (m, 4H), 6.82 (m, 1H), 6.71 (d,  $J = 6.8$  Hz, 2H);  $^{13}\text{C}$  NMR (100 MHz,  $\text{CD}_3\text{COCD}_3$ , ppm)  $\delta$  143.0, 142.5, 128.8, 128.2, 127.4, 127.0, 126.6, 123.4, 120.7, 117.6, 116.5, 115.8; MS (EI)  $m/z$  (%) 233 (100), 198, 188, 166, 154.

**2-Methyl-10H-phenothiazine (3o, CAS: 5828-51-3)**<sup>[1]</sup>

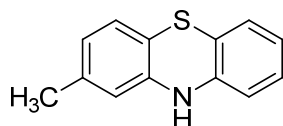

The reaction was conducted with 2-amino-4-methylbenzenethiol (**1f**, 27.8 mg, 0.2 mmol) and cyclohexanone (**2a**, 31.0  $\mu\text{L}$ , 0.3 mmol). The residue was purified by column chromatography on neutral aluminum oxide (petroleum ether/EtOAc = 20:1) to give **3o** as yellow solid (27.7 mg, 65%). This product is same as **3j**.  $^1\text{H}$  NMR (400 MHz,  $\text{CD}_3\text{COCD}_3$ , ppm)  $\delta$  7.76 (brs, 1H), 6.98-6.93 (m, 2H), 6.83-6.78 (m, 2H), 6.71 (d,  $J = 7.6$  Hz, 1H), 6.63 (d,  $J = 6.8$  Hz, 1H), 6.55 (s, 1H), 2.17 (s, 3H);  $^{13}\text{C}$  NMR (100 MHz,  $\text{CD}_3\text{COCD}_3$ , ppm)  $\delta$  143.6, 143.4, 138.3, 128.3, 127.3, 127.1, 123.8, 122.9, 118.9, 116.4, 115.6, 115.2, 21.2; MS (EI)  $m/z$  (%) 213 (100), 198, 180, 167, 152.

**2-(Trifluoromethyl)-10H-phenothiazine (3p, CAS: 92-30-8)**<sup>[1]</sup>

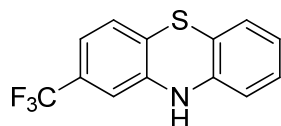

The reaction was conducted with 2-amino-4-(trifluoromethyl)benzenethiol hydrochloride (**1g**, 45.9 mg, 0.2 mmol) and cyclohexanone (**2a**, 31.0  $\mu$ L, 0.3 mmol). The residue was purified by column chromatography on neutral aluminum oxide (petroleum ether) to give **3p** as yellow solid (32.0 mg, 60%).  $^1\text{H}$  NMR (400 MHz,  $\text{CD}_3\text{COCD}_3$ , ppm)  $\delta$  8.11 (brs, 1H), 7.13-6.96 (m, 5H), 6.85 (m, 1H), 6.72 (d,  $J = 6.8$  Hz, 1H);  $^{13}\text{C}$  NMR (100 MHz,  $\text{CD}_3\text{COCD}_3$ , ppm)  $\delta$  144.0, 142.4, 130.2 (q,  $J = 31.9$  Hz), 129.0, 127.8, 127.4, 125.3 (q,  $J = 271.3$  Hz), 124.0 (q,  $J = 2.0$  Hz), 123.8, 119.3 (q,  $J = 4.0$  Hz), 117.5, 115.9, 115.5 (q,  $J = 3.8$  Hz); MS (EI)  $m/z$  (%) 267 (100), 247, 235, 222, 91.

### 2-Fluoro-10H-phenothiazine (**3q**, CAS: 397-58-0)<sup>[1]</sup>

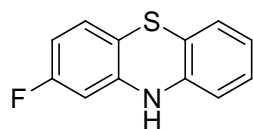

The reaction was conducted with 2-amino-4-fluorobenzenethiol (**1h**, 28.6 mg, 0.2 mmol), and cyclohexanone (**2a**, 31.0  $\mu$ L, 0.3 mmol). The residue was purified by column chromatography on neutral aluminum oxide (petroleum ether/EtOAc = 50:1) to give **3q** as yellow solid (25.2 mg, 58%).  $^1\text{H}$  NMR (400 MHz,  $\text{CD}_3\text{COCD}_3$ , ppm)  $\delta$  8.07 (brs, 1H), 7.02-6.96 (m, 3H), 6.83 (m, 1H), 6.72 (d,  $J = 6.0$  Hz, 1H), 6.59-6.51 (m, 2H);  $^{13}\text{C}$  NMR (100 MHz,  $\text{CD}_3\text{COCD}_3$ , ppm)  $\delta$  163.8 (d,  $J = 240.5$  Hz), 145.4 (d,  $J = 10.5$  Hz), 142.6, 128.6, 128.4 (d,  $J = 9.7$  Hz), 127.4, 123.6, 118.6, 115.8, 113.8, 109.3 (d,  $J = 22.5$  Hz), 102.8 (d,  $J = 26.1$  Hz); MS (EI)  $m/z$  (%) 217 (100), 185, 172, 157, 91.

### 2-Chloro-10H-phenothiazine (**3r**, CAS: 92-39-7)<sup>[1]</sup>

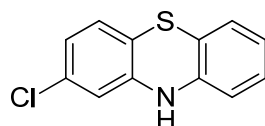

The reaction was conducted with 2-amino-4-chlorobenzenethiol (**1i**, 31.9 mg, 0.2 mmol) and cyclohexanone (**2a**, 31.0  $\mu$ L, 0.3 mmol). The residue was purified by column chromatography on neutral aluminum oxide (petroleum ether/EtOAc = 20:1) to give **3r** as yellow solid (32.7 mg,



70%).  $^1\text{H}$  NMR (400 MHz,  $\text{CD}_3\text{COCD}_3$ , ppm)  $\delta$  8.02 (brs, 1H), 7.02-6.95 (m, 3H), 6.83-6.70 (m, 4H);  $^{13}\text{C}$  NMR (100 MHz,  $\text{CD}_3\text{COCD}_3$ , ppm)  $\delta$  144.9, 142.6, 133.5, 128.7, 128.4, 127.4, 123.6, 122.6, 118.2, 117.6, 115.9, 115.2; MS (EI)  $m/z$  (%) 233 (100), 198, 188, 166, 154.

**3-Chloro-7-methyl-10H-phenothiazine (3t, CAS: 35565-23-2)**<sup>[6]</sup>

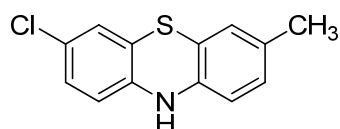

The reaction was conducted with 2-amino-5-chlorobenzenethiol (**1e**, 31.9 mg, 0.2 mmol) and 4-methylcyclohexanone (**2b**, 36.8  $\mu\text{L}$ , 0.3 mmol). The residue was purified by column chromatography on neutral aluminum oxide (petroleum ether/EtOAc = 20:1) to give **3t** as yellow solid (35.0 mg, 71%).  $^1\text{H}$  NMR (400 MHz,  $\text{CD}_3\text{COCD}_3$ , ppm)  $\delta$  7.86 (brs, 1H), 6.99-6.97 (m, 2H), 6.83-6.78 (m, 2H), 6.68 (d,  $J = 8.0$  Hz, 1H), 6.61 (d,  $J = 7.6$  Hz, 1H), 2.18 (s, 3H);  $^{13}\text{C}$  NMR (100 MHz,  $\text{CD}_3\text{COCD}_3$ , ppm)  $\delta$  142.8, 142.8, 140.6, 132.9, 129.3, 128.1, 127.7, 126.6, 120.7, 117.5, 116.3, 115.6, 20.5; MS (EI)  $m/z$  (%) 247 (100), 232, 212, 178, 168.

**3-Chloro-7-ethyl-10H-phenothiazine (3u, CAS: 106837-73-4)**<sup>[7]</sup>

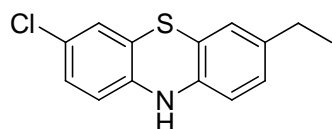

The reaction was conducted with 2-amino-5-chlorobenzenethiol (**1e**, 31.9 mg, 0.2 mmol) and 4-ethylcyclohexanone (**2c**, 42.3  $\mu\text{L}$ , 0.3 mmol). The residue was purified by column chromatography on neutral aluminum oxide (petroleum ether/EtOAc = 20:1) to give **3u** as yellow solid (39.7 mg, 76%).  $^1\text{H}$  NMR (400 MHz,  $\text{CD}_3\text{COCD}_3$ , ppm)  $\delta$  7.89 (brs, 1H), 6.97 (s, 2H), 6.87-6.82 (m, 2H), 6.70-6.63 (m, 2H), 2.48 (m, 2H), 1.14 (m, 3H);  $^{13}\text{C}$  NMR (100 MHz,  $\text{CD}_3\text{COCD}_3$ , ppm)  $\delta$  142.8, 140.8, 139.6, 128.1, 128.1, 126.7, 126.6, 120.7, 117.5, 117.5, 116.4, 115.7, 28.6, 16.2; MS (EI)  $m/z$  (%) 261 (100), 246, 210, 167, 123.

**3-Chloro-7-tert-pentyl-10H-phenothiazine (3v)**

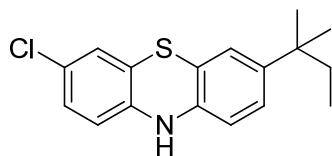

The reaction was conducted with 2-amino-5-chlorobenzenethiol (**1e**, 31.9 mg, 0.2 mmol) and 4-(tert-pentyl)cyclohexanone (**2e**, 54.9  $\mu$ L, 0.3 mmol). The residue was purified by column chromatography on neutral aluminum oxide (petroleum ether/EtOAc = 20:1) to give **3v** as yellow solid (49.0 mg, 81%).  $^1\text{H}$  NMR (400 MHz,  $\text{CD}_3\text{COCD}_3$ , ppm)  $\delta$  7.91 (brs, 1H), 6.98-6.93 (m, 4H), 6.71-6.65 (m, 2H), 1.59 (m, 2H), 1.21 (s, 6H), 0.66 (m, 3H);  $^{13}\text{C}$  NMR (100 MHz,  $\text{CD}_3\text{COCD}_3$ , ppm)  $\delta$  144.7, 142.8, 140.4, 128.1, 126.7, 126.6, 126.4, 124.9, 120.8, 117.2, 116.4, 115.4, 38.2, 37.4, 28.9, 9.6; HRMS (ESI,  $m/z$ ): calcd for  $\text{C}_{17}\text{H}_{18}\text{ClNS}$   $[\text{M}]^+$  303.0843, found 303.0843

#### Ethyl 7-chloro-10H-phenothiazine-3-carboxylate (**3w**)

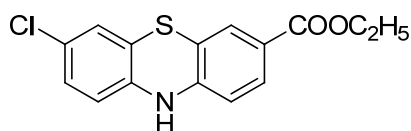

The reaction was conducted with 2-amino-5-chlorobenzenethiol (**1e**, 31.9 mg, 0.2 mmol) and ethyl 4-oxocyclohexanecarboxylate (**2g**, 47.8  $\mu$ L, 0.3 mmol). The residue was purified by column chromatography on neutral aluminum oxide (petroleum ether/EtOAc = 20:1) to give **3w** as yellow solid (52.0 mg, 85%).  $^1\text{H}$  NMR (400 MHz,  $\text{CD}_3\text{COCD}_3$ , ppm)  $\delta$  8.41 (brs, 1H), 7.63 (d,  $J = 7.2$  Hz, 1H), 7.53 (s, 1H), 7.03-7.01 (m, 2H), 6.73 (m, 2H), 4.27 (m, 2H), 1.33 (m, 3H);  $^{13}\text{C}$  NMR (100 MHz,  $\text{CD}_3\text{COCD}_3$ , ppm)  $\delta$  165.9, 146.9, 140.8, 130.7, 128.4, 128.0, 128.0, 126.7, 125.5, 120.2, 117.4, 117.0, 115.1, 61.3, 14.8; HRMS (ESI,  $m/z$ ): calcd for  $\text{C}_{15}\text{H}_{13}\text{ClNO}_2\text{S}$   $[\text{M}+\text{H}]^+$  306.0350, found 306.0350

#### References

- [1] Ma, D. W.; Geng, Q.; Zhang, H.; Jiang, Y. W. *Angew. Chem. Int. Ed.* **2010**, *49*, 291.
- [2] Dai, C.; Sun, X. F.; Tu, X. Z.; Wu, L.; Zhan, D.; Zeng, Q. L. *Chem. Commun.* **2012**, *48*, 5367
- [3] Takada, A.; Nishimura, H. *Chem. Pharm. Bull.* **1962**, *10*, 1.
- [4] Madrid, P. B.; Polgar, W. E.; Toll, L.; Tanga, M. J. *Bioorg. Med. Chem. Lett.* **2007**, *17*, 3014.
- [5] Craig, C.; Warburton. *Aust. J Chem.* **1956**, *9*, 294.

[6] Thomas, L.; Gupta, A.; Gupta, V. *Heterocycl. Commun.* **2002**, *8*, 343.

[7] Sen.; Sen, G. *J. Indian Chem. Soc.* **1957**, *34*, 413.

### $^1\text{H}$ NMR and $^{13}\text{C}$ NMR spectra

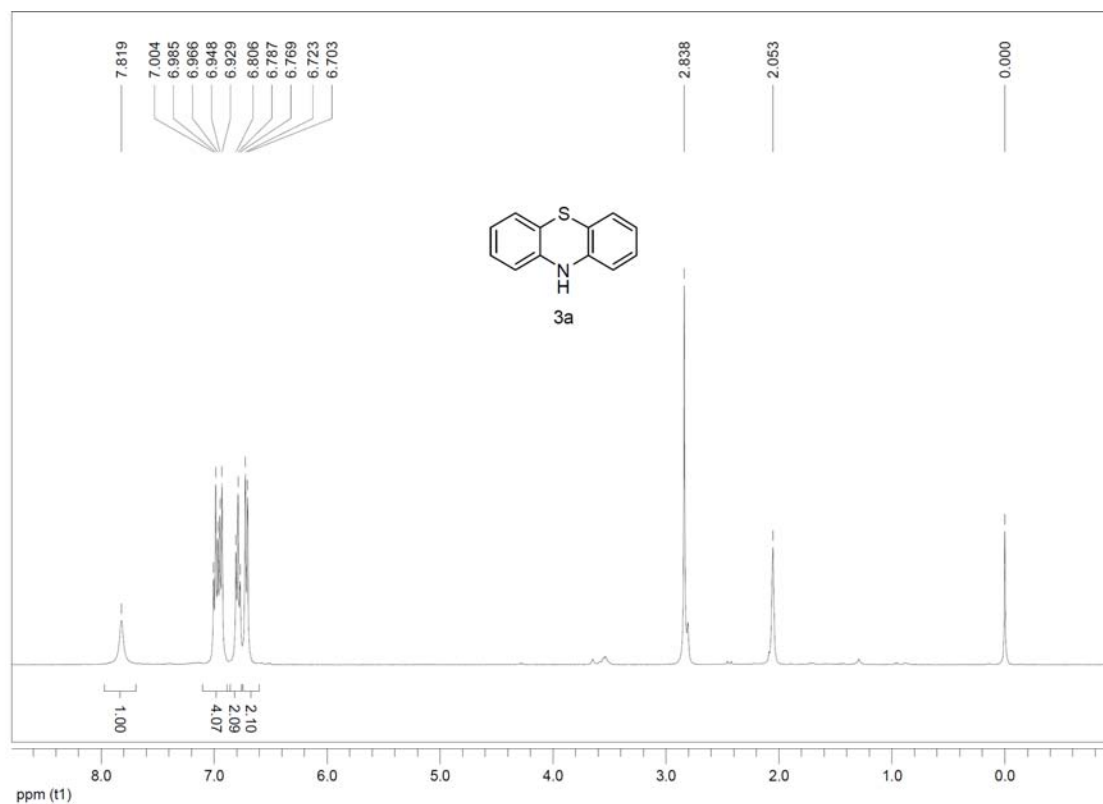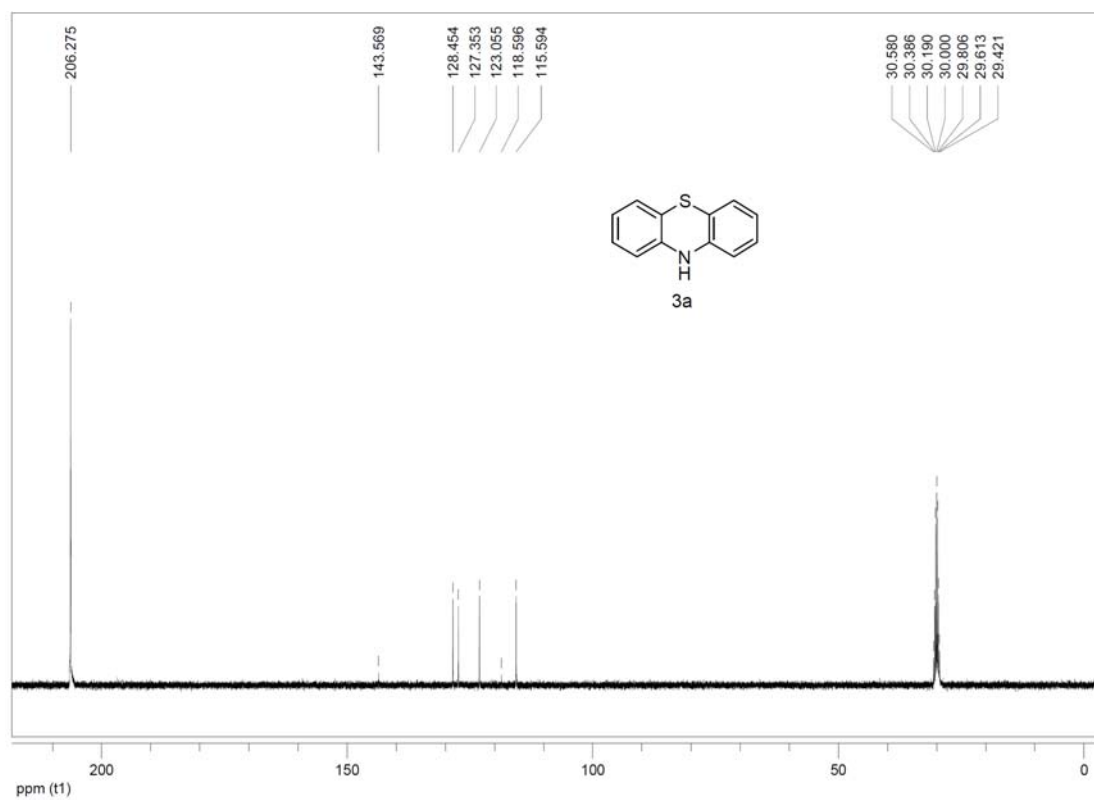

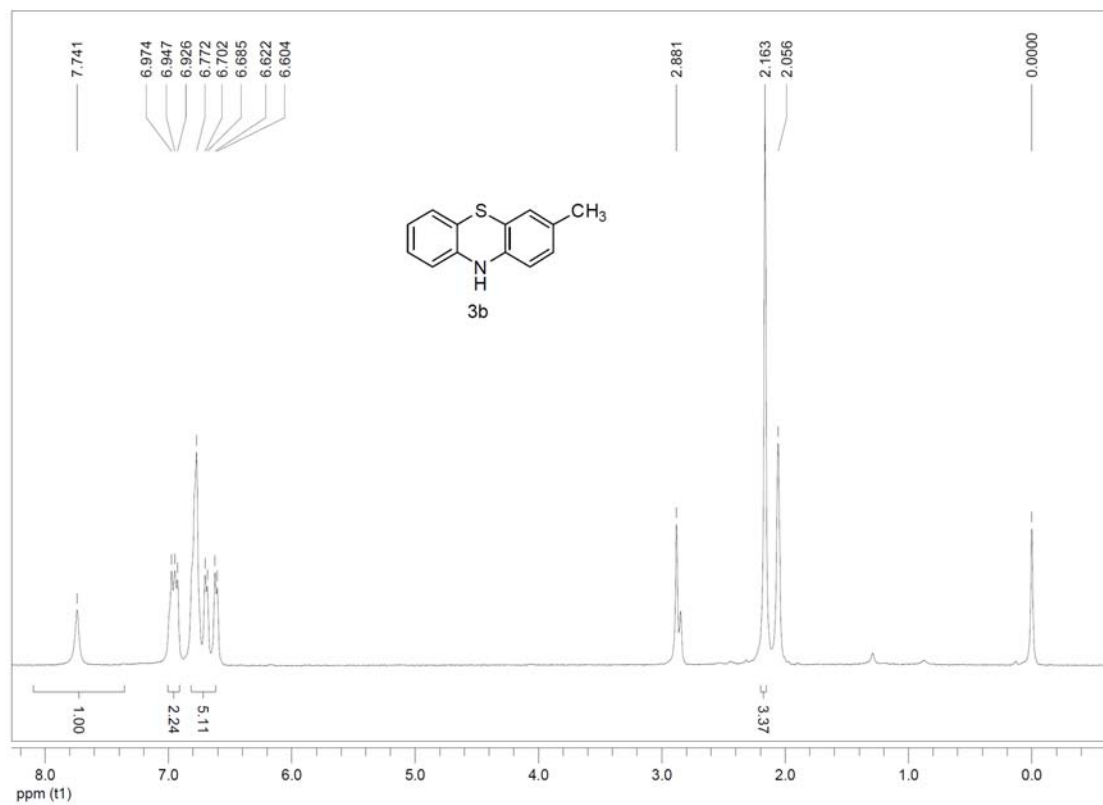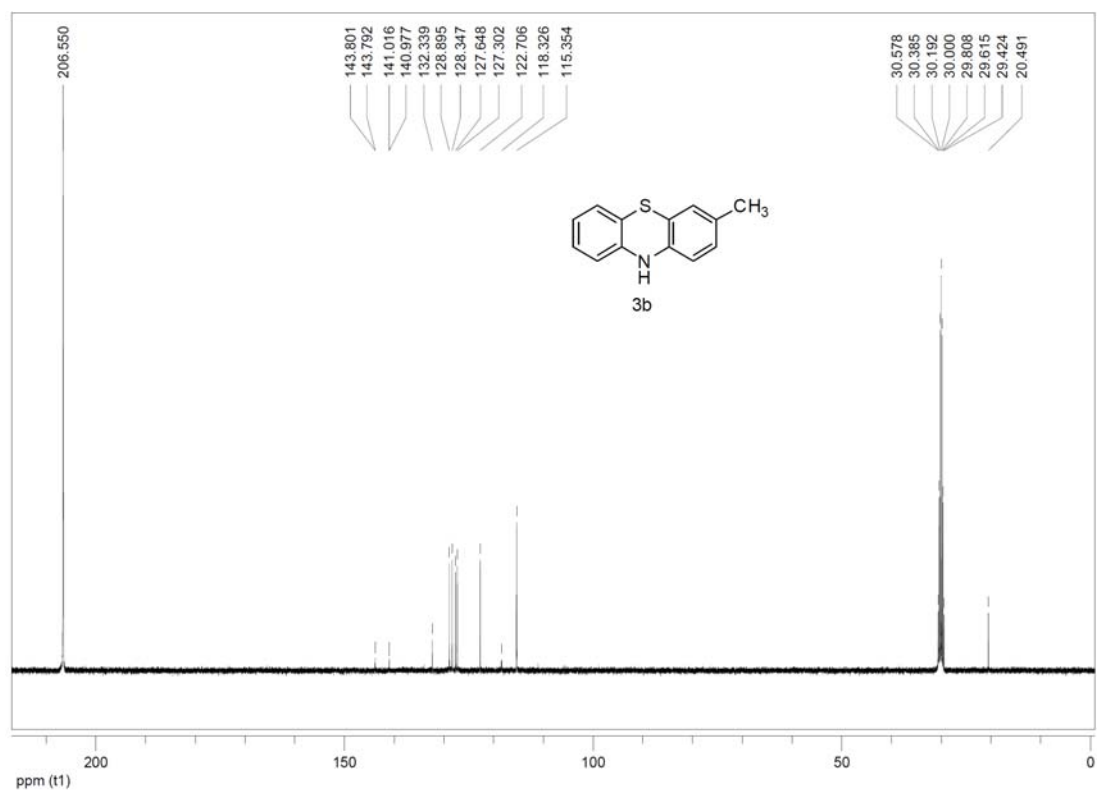

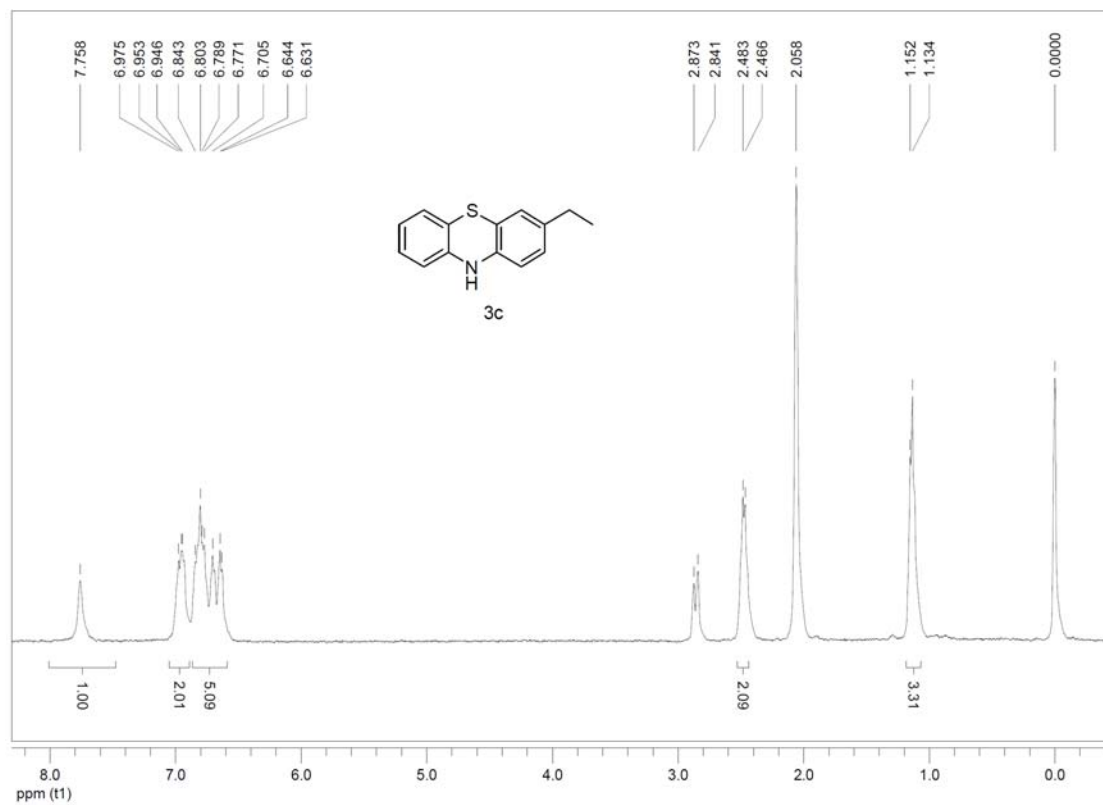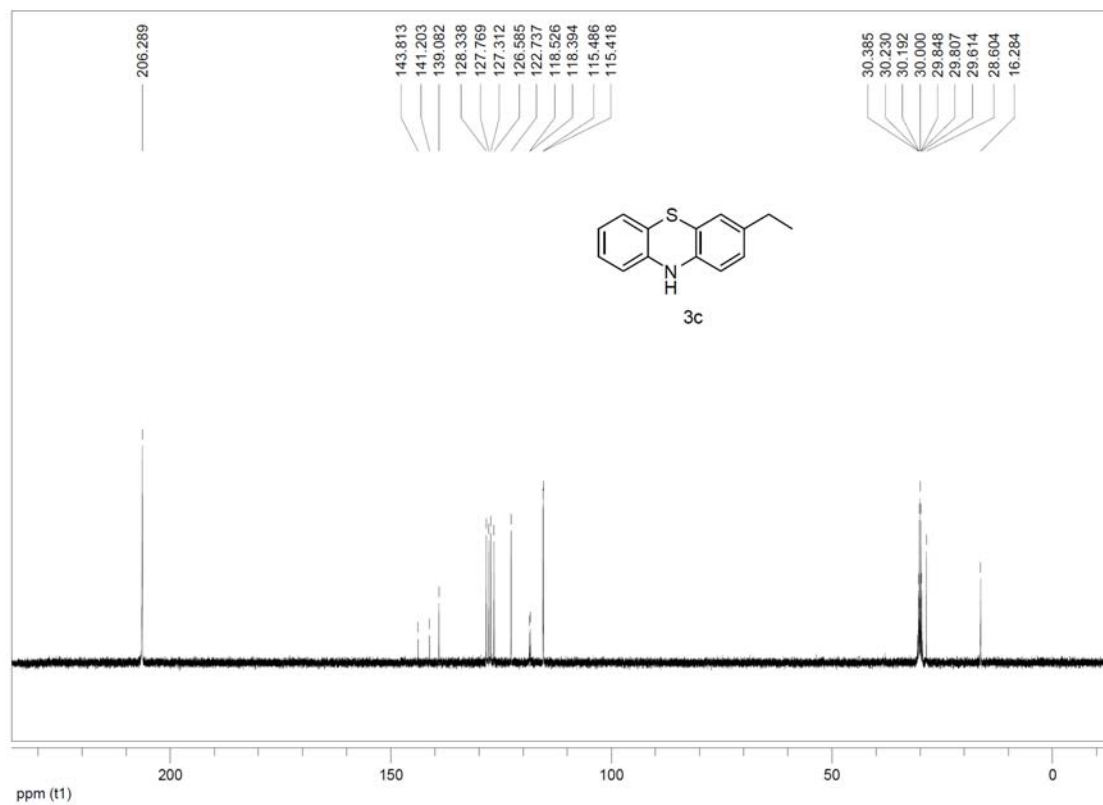

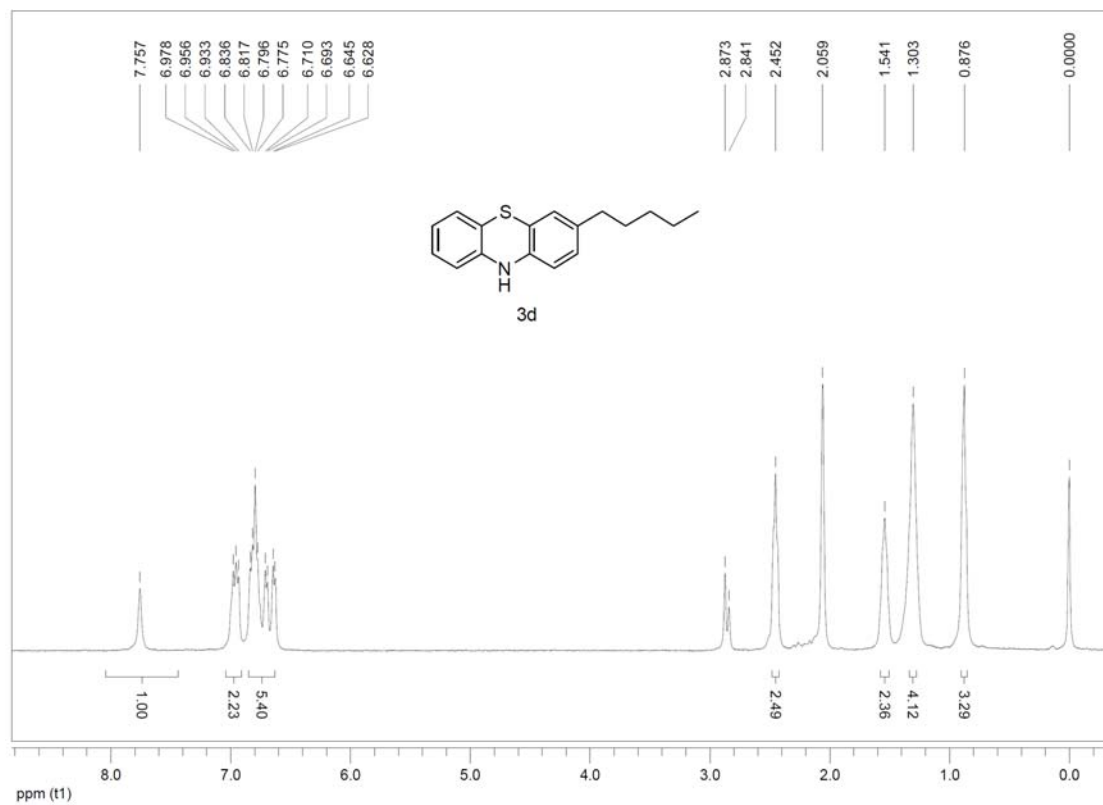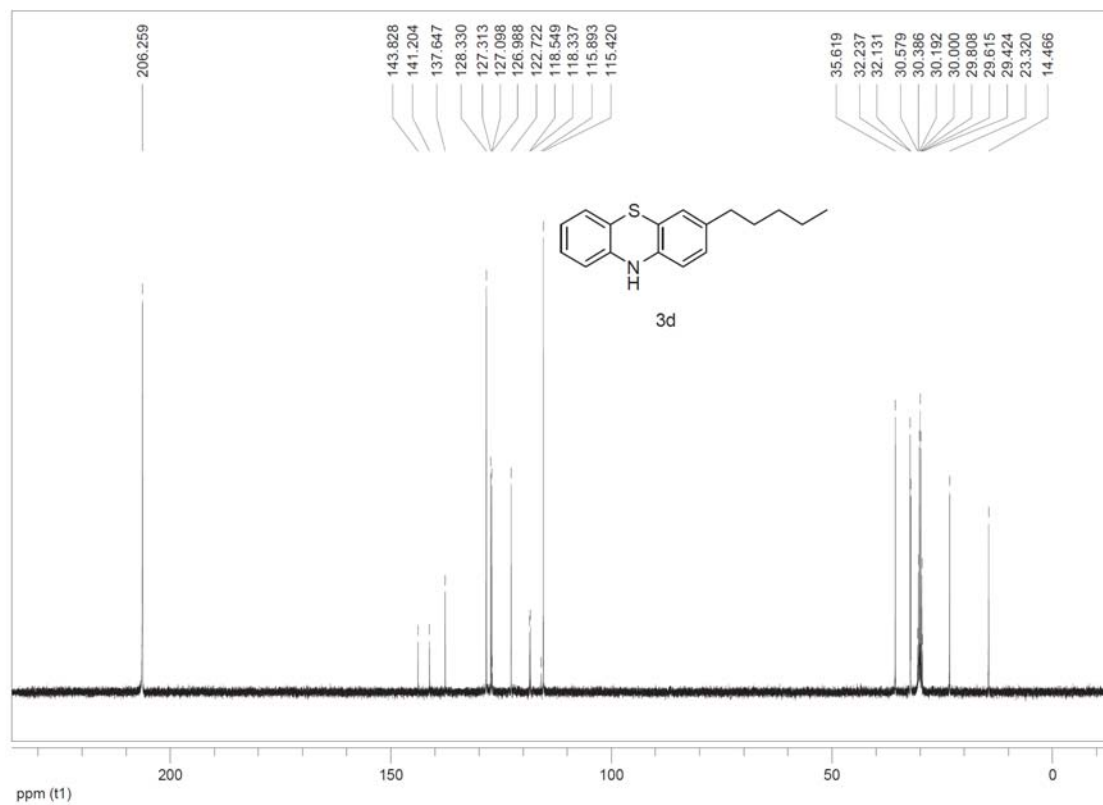

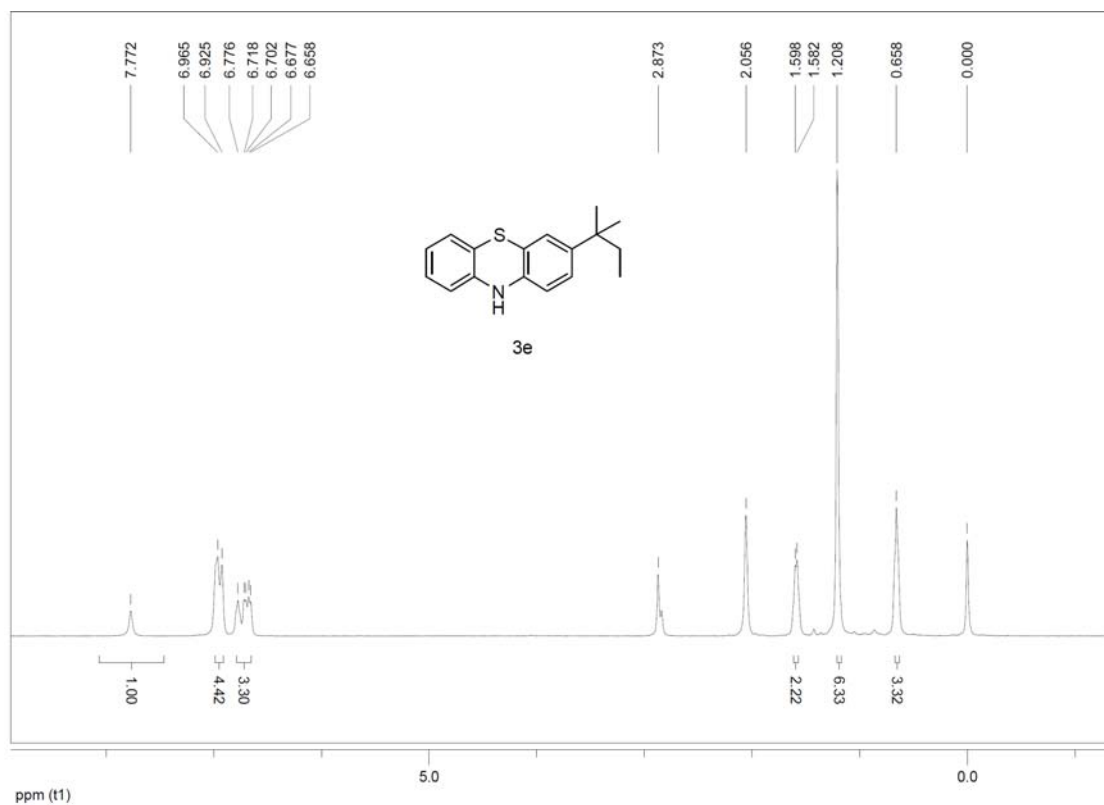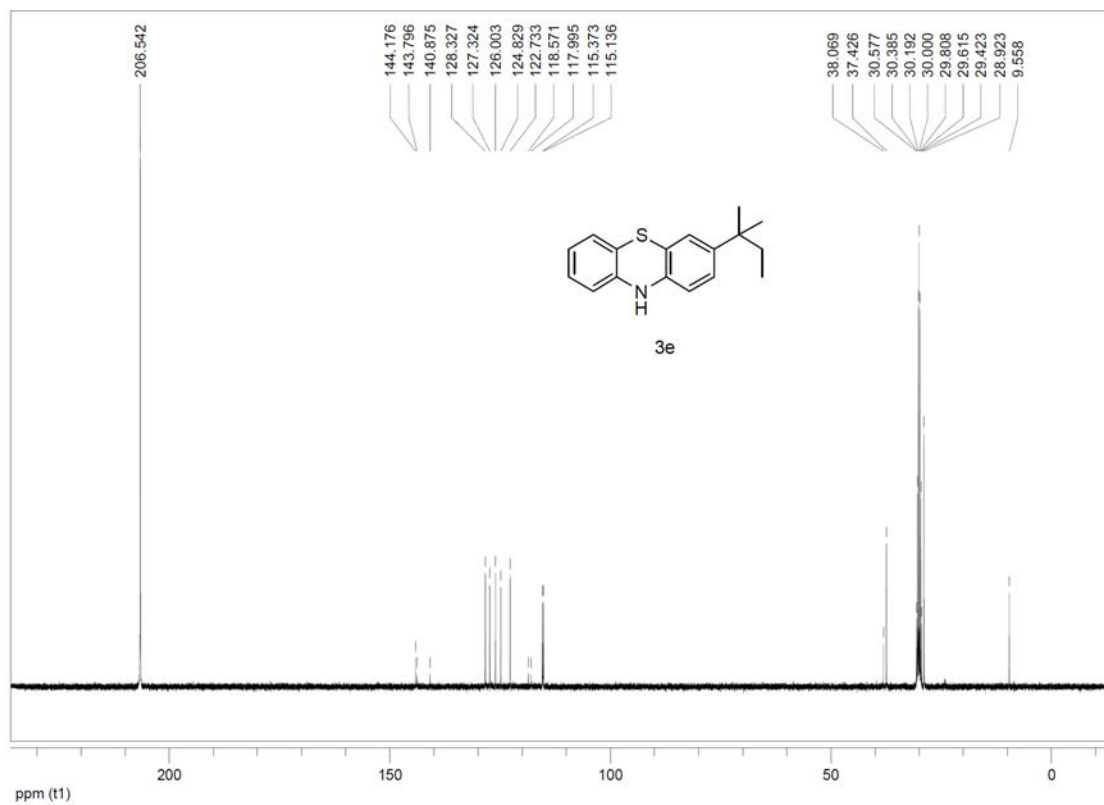



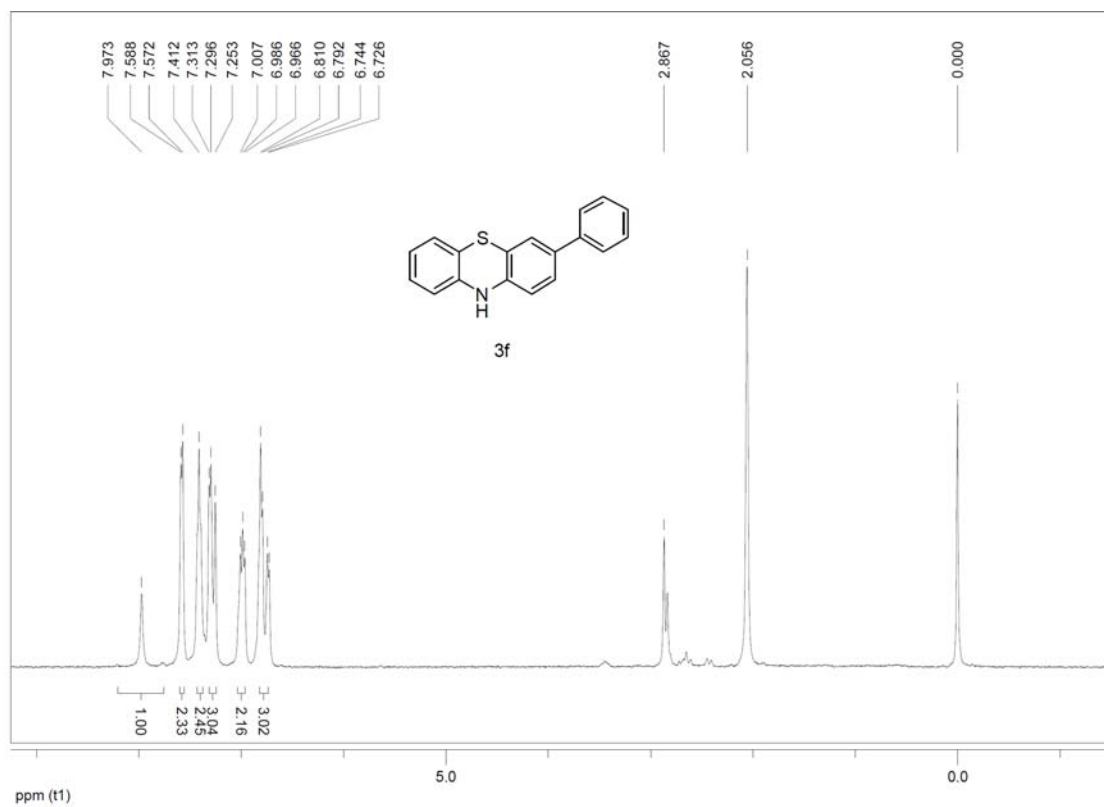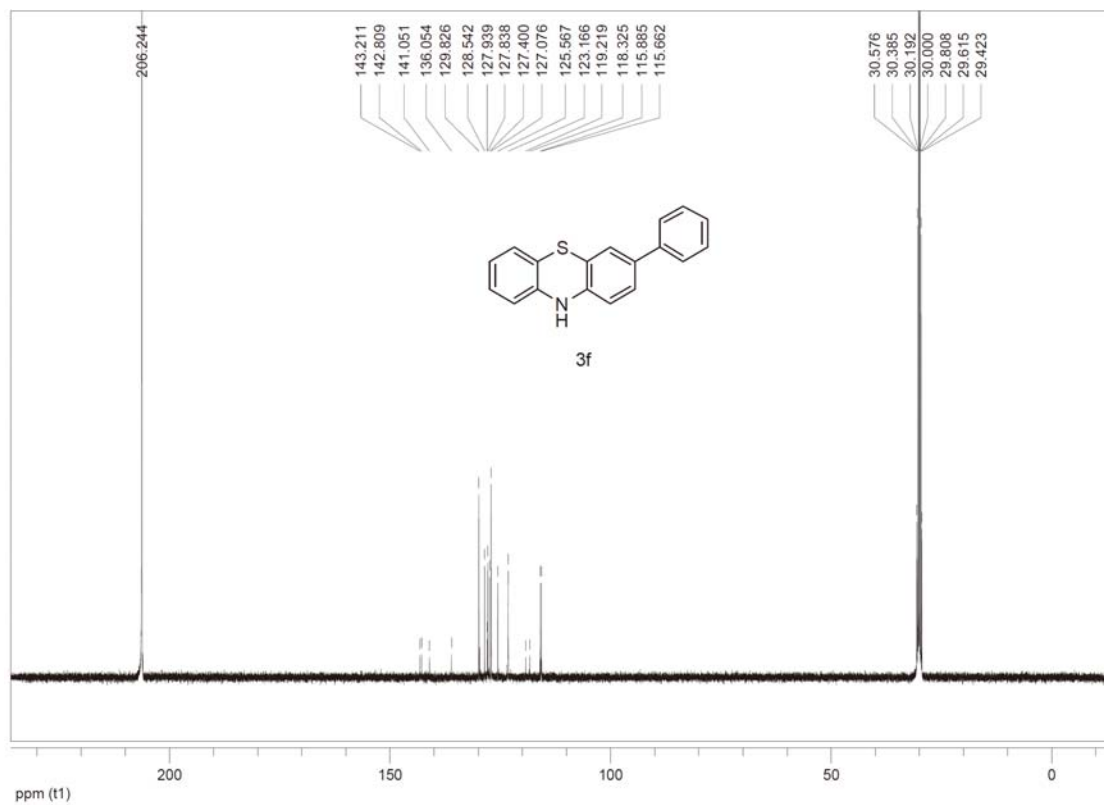

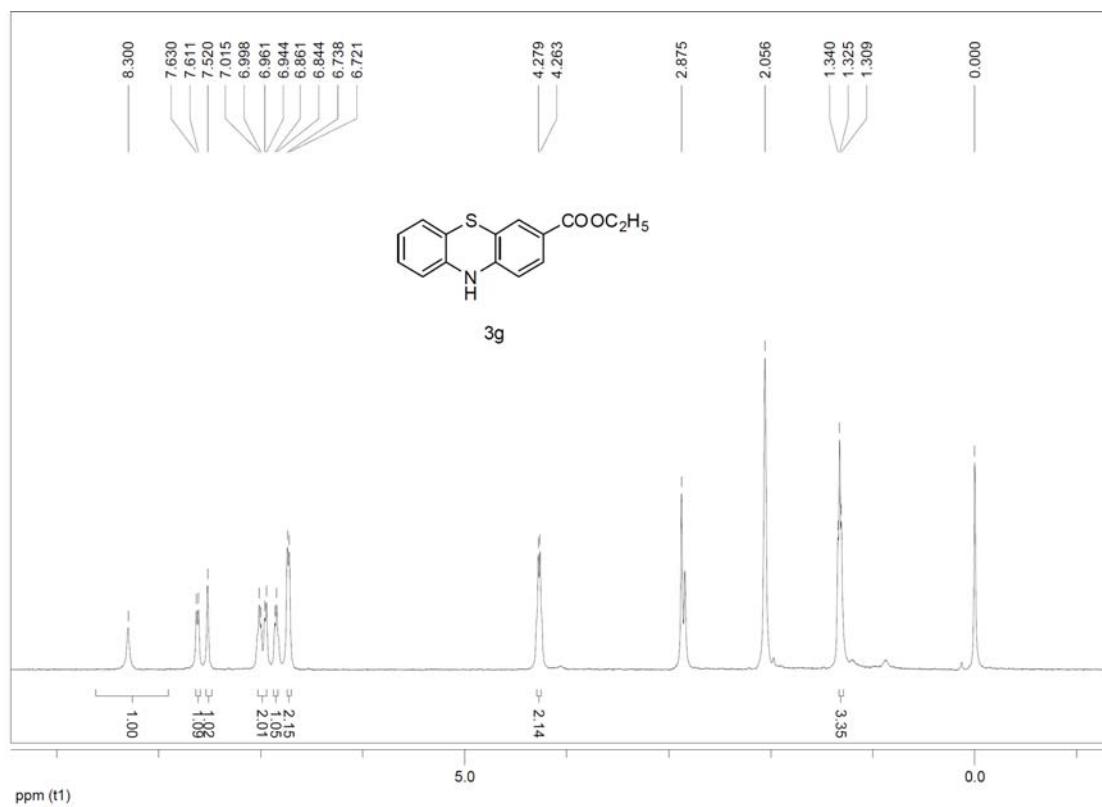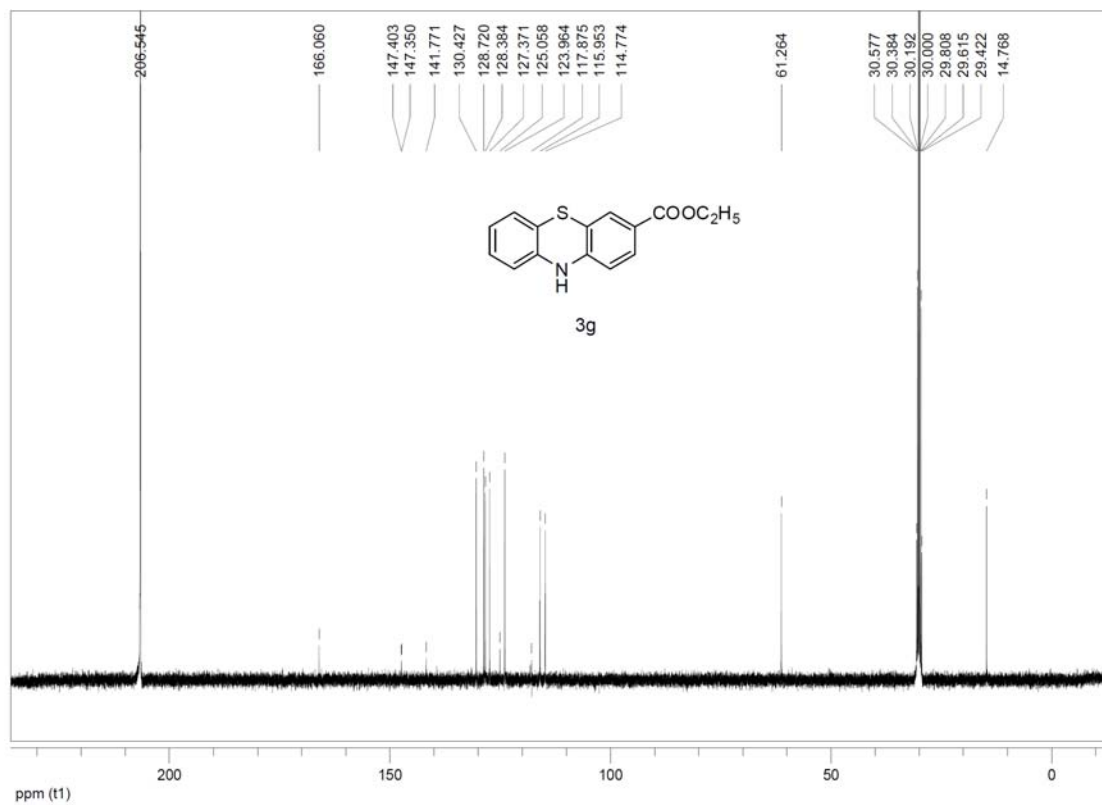

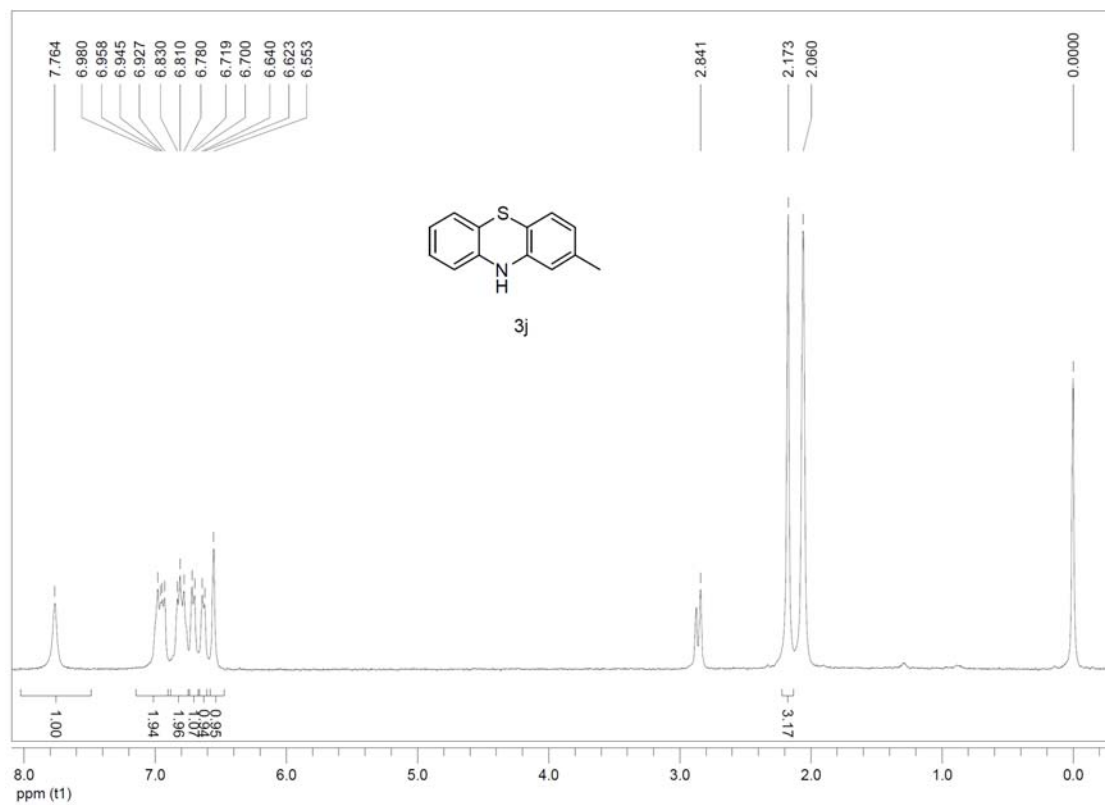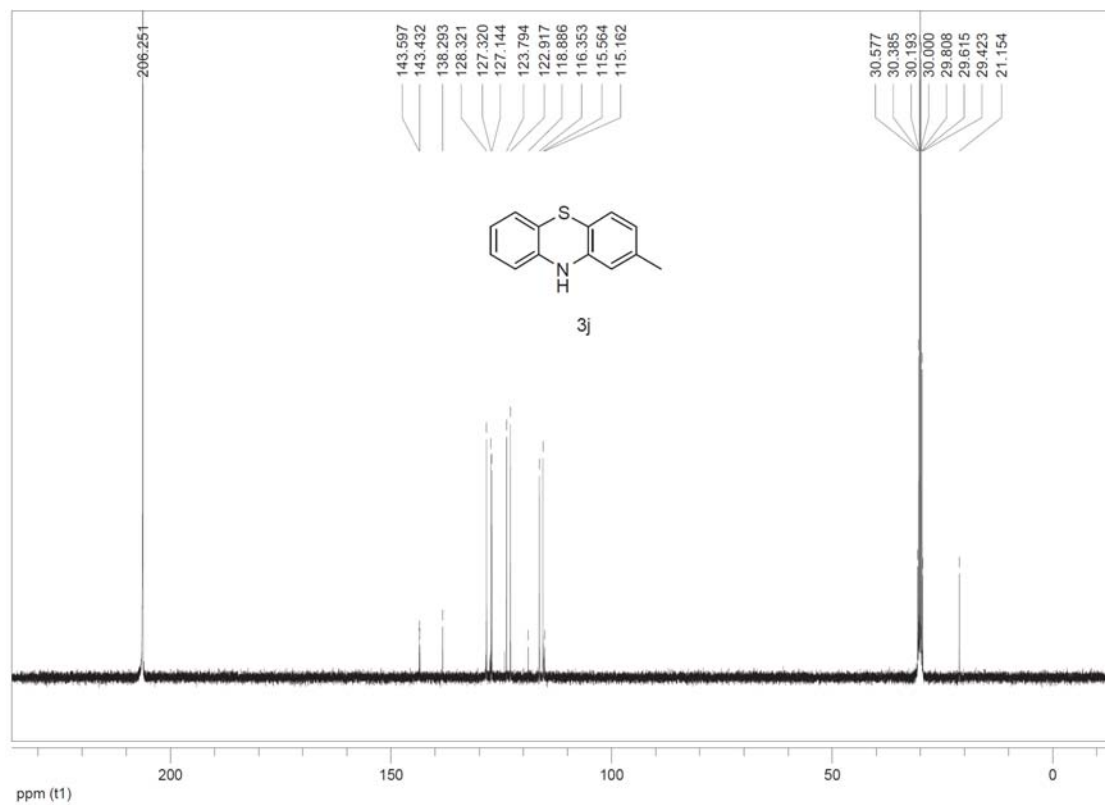

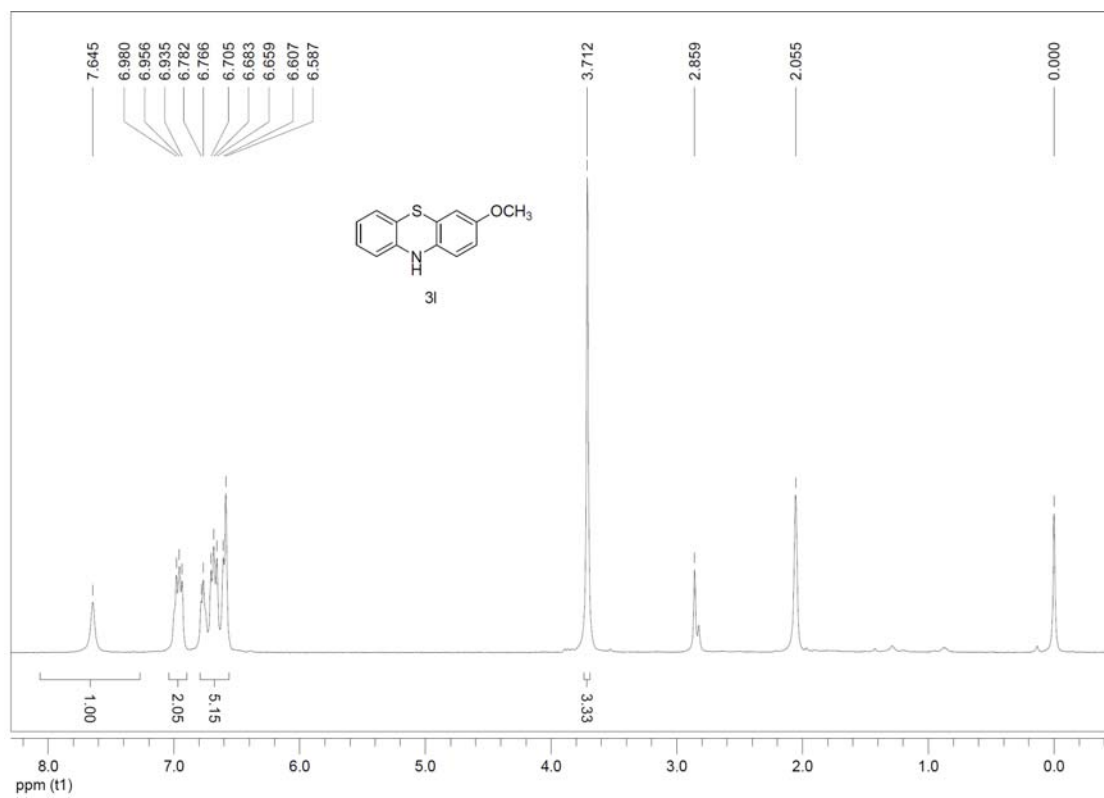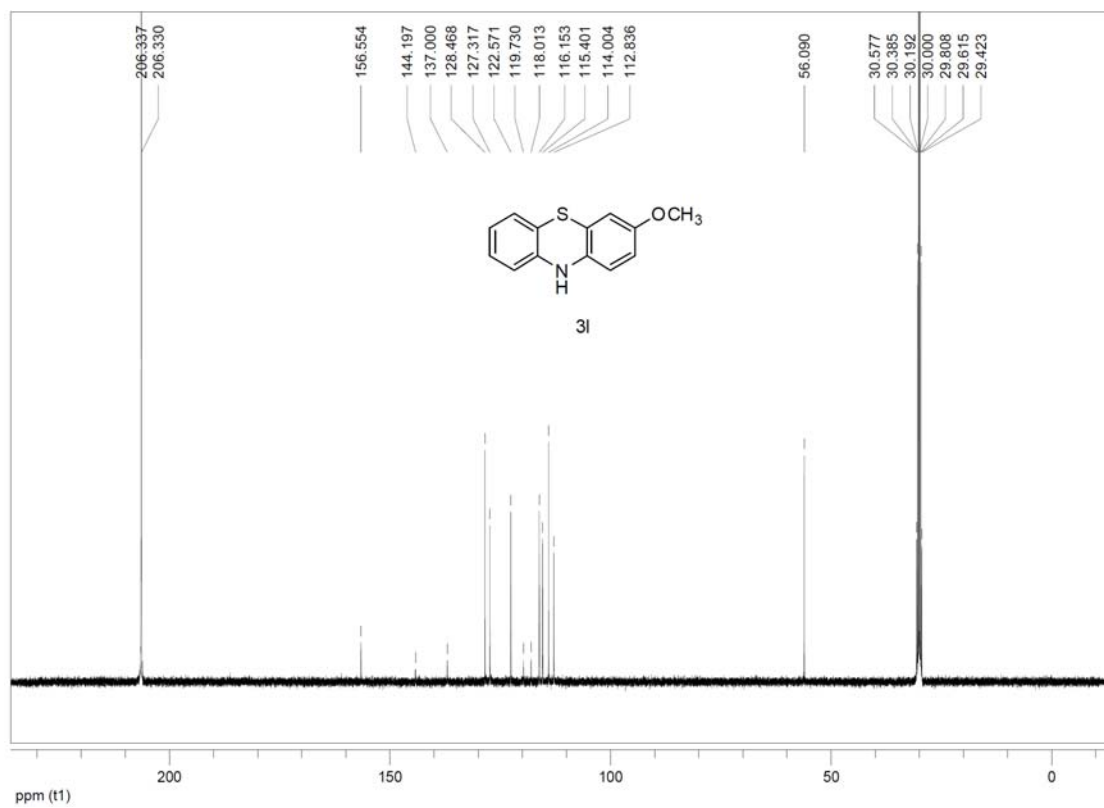

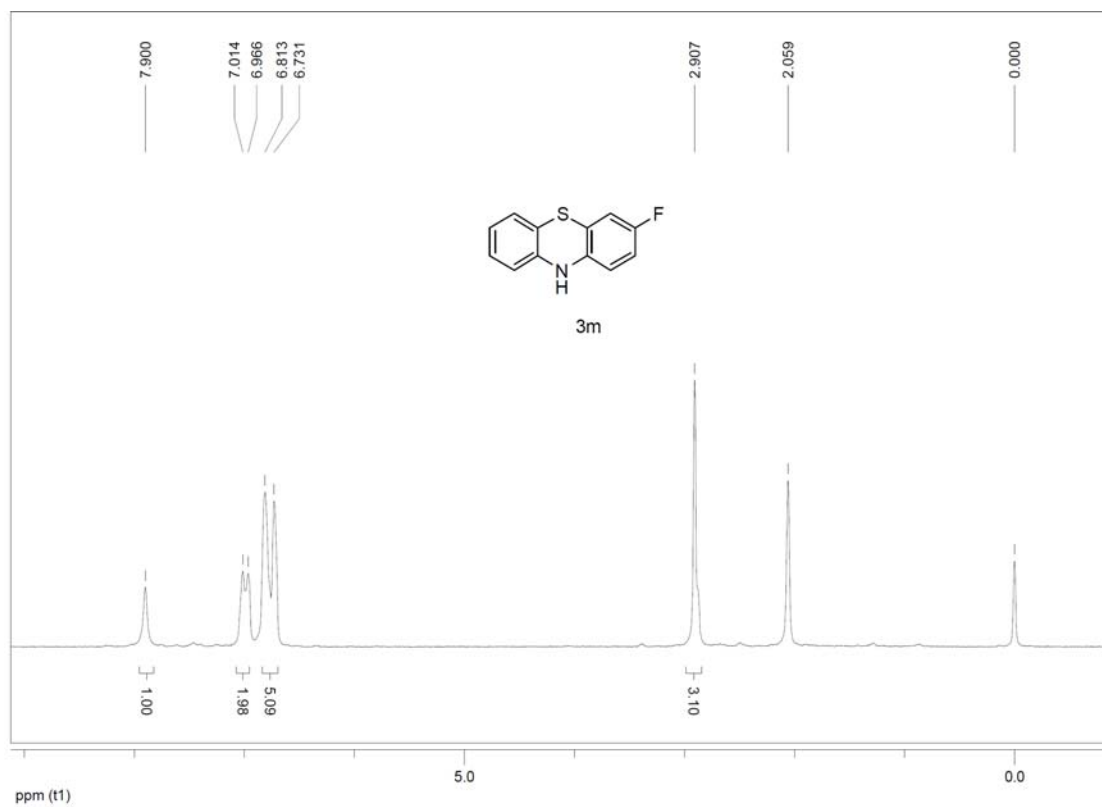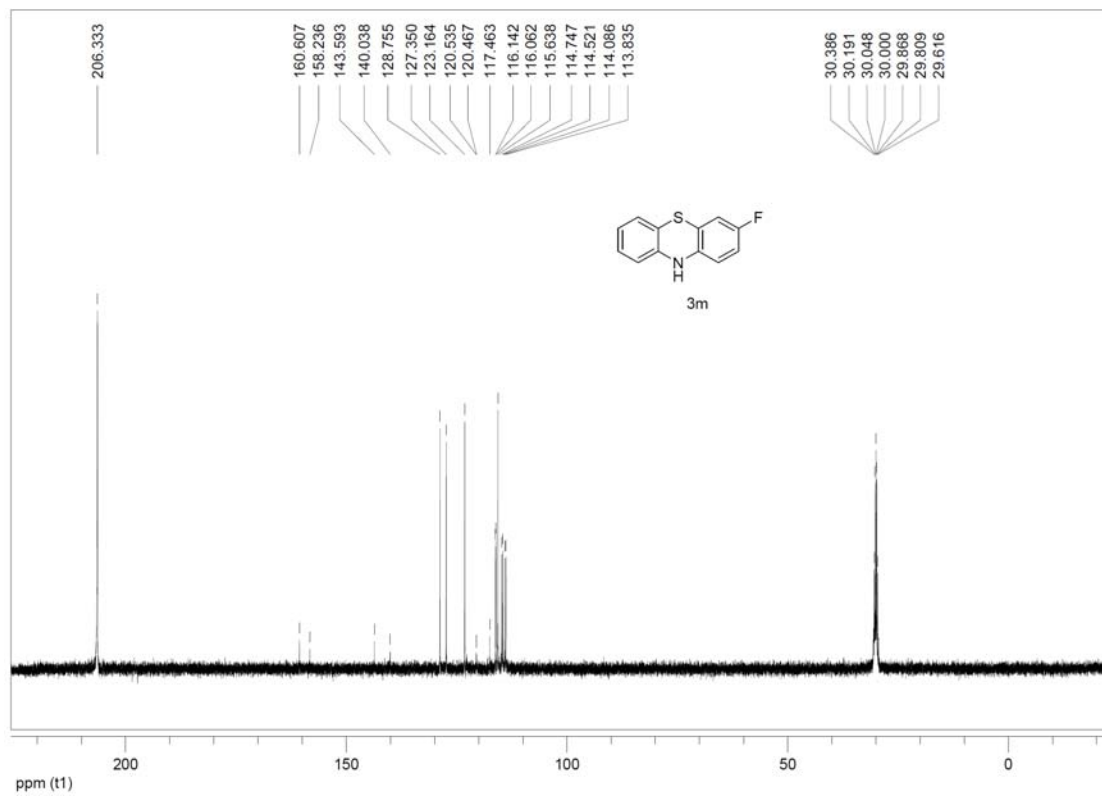

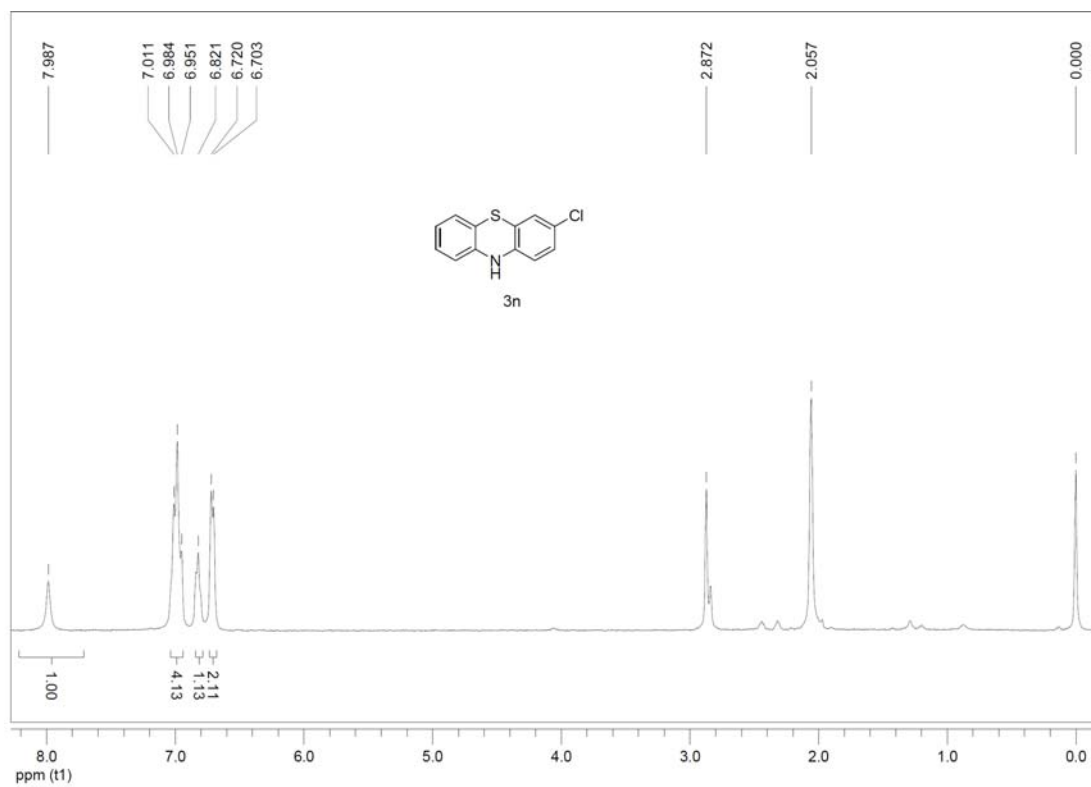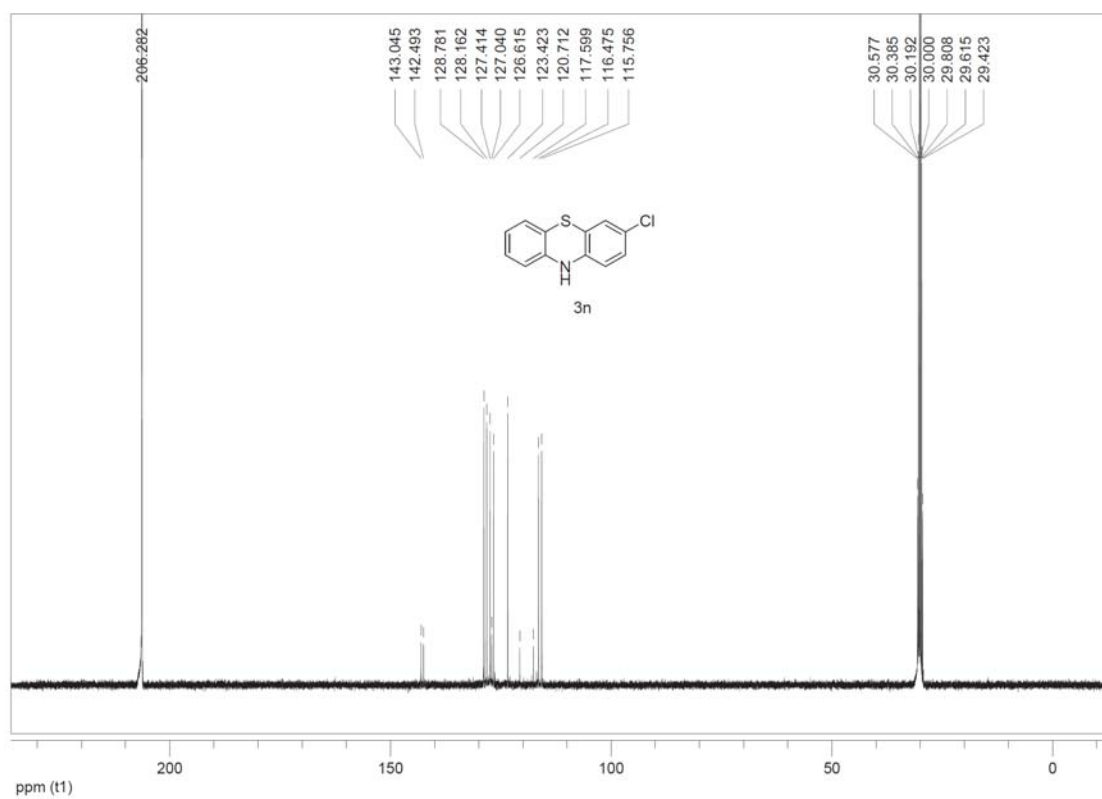

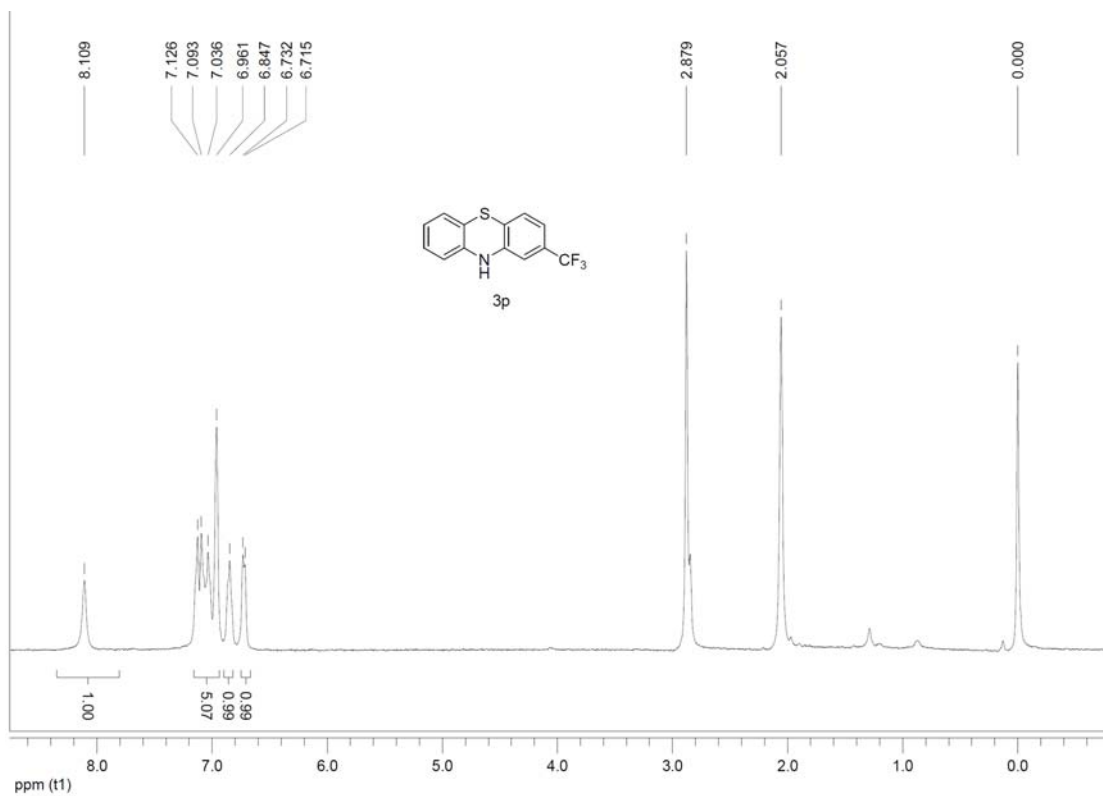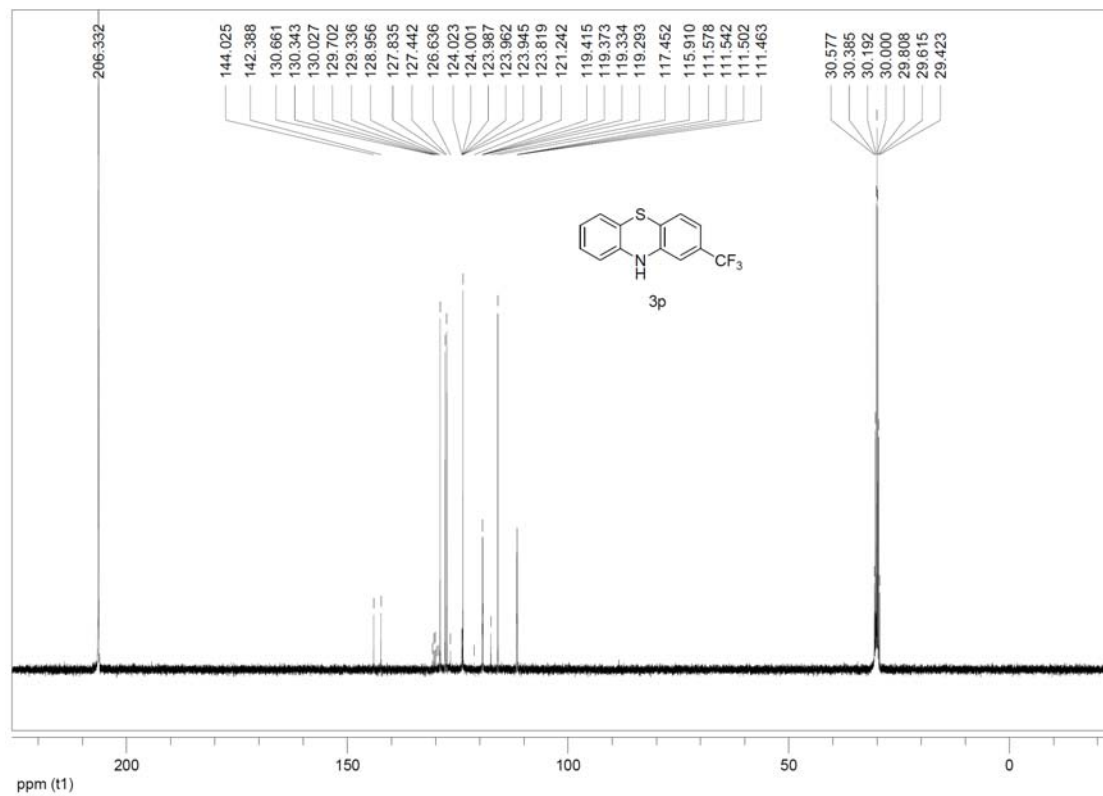

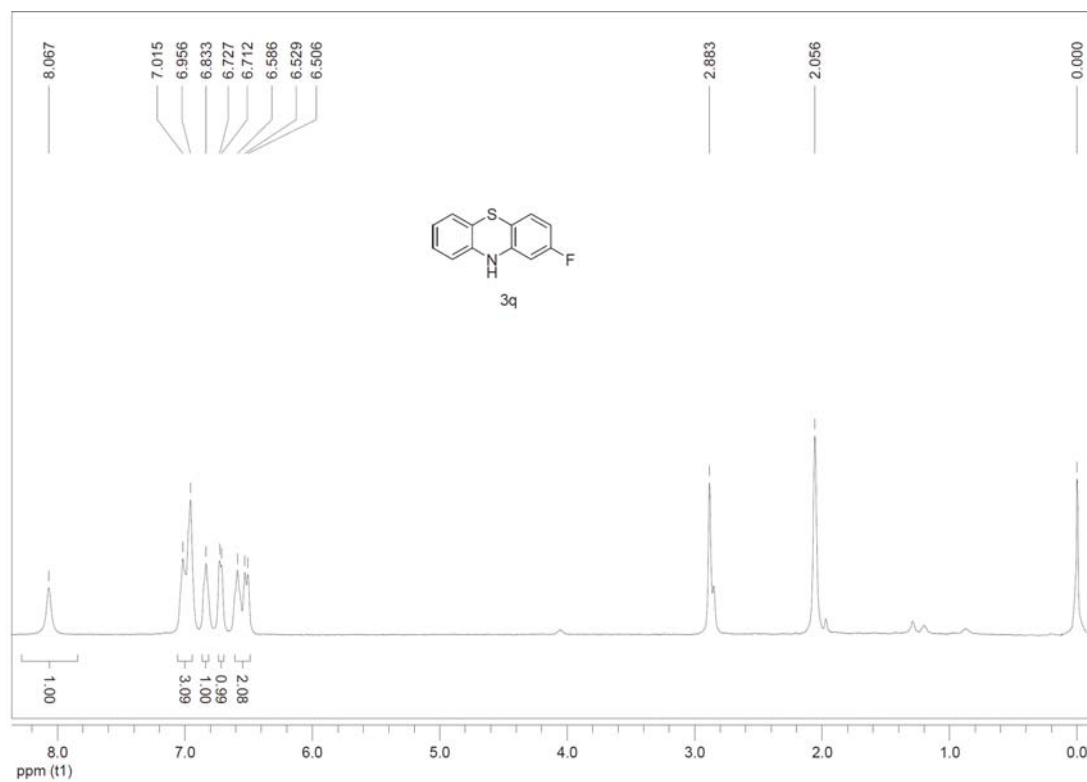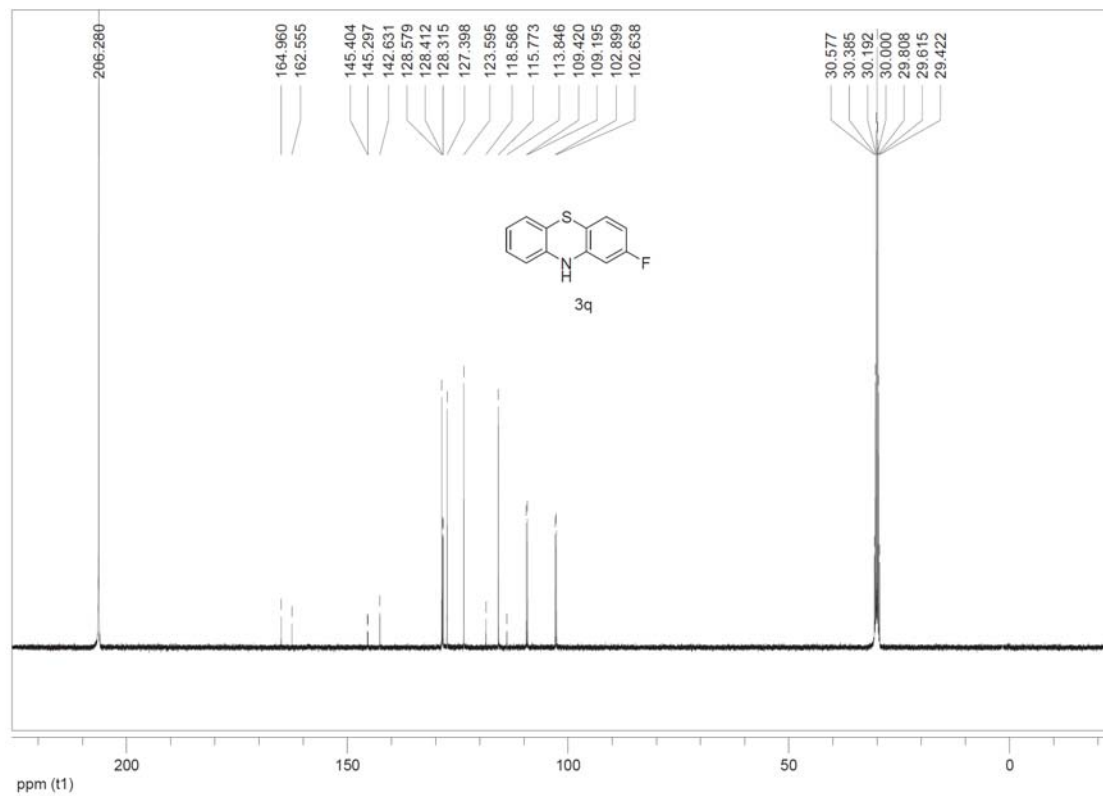



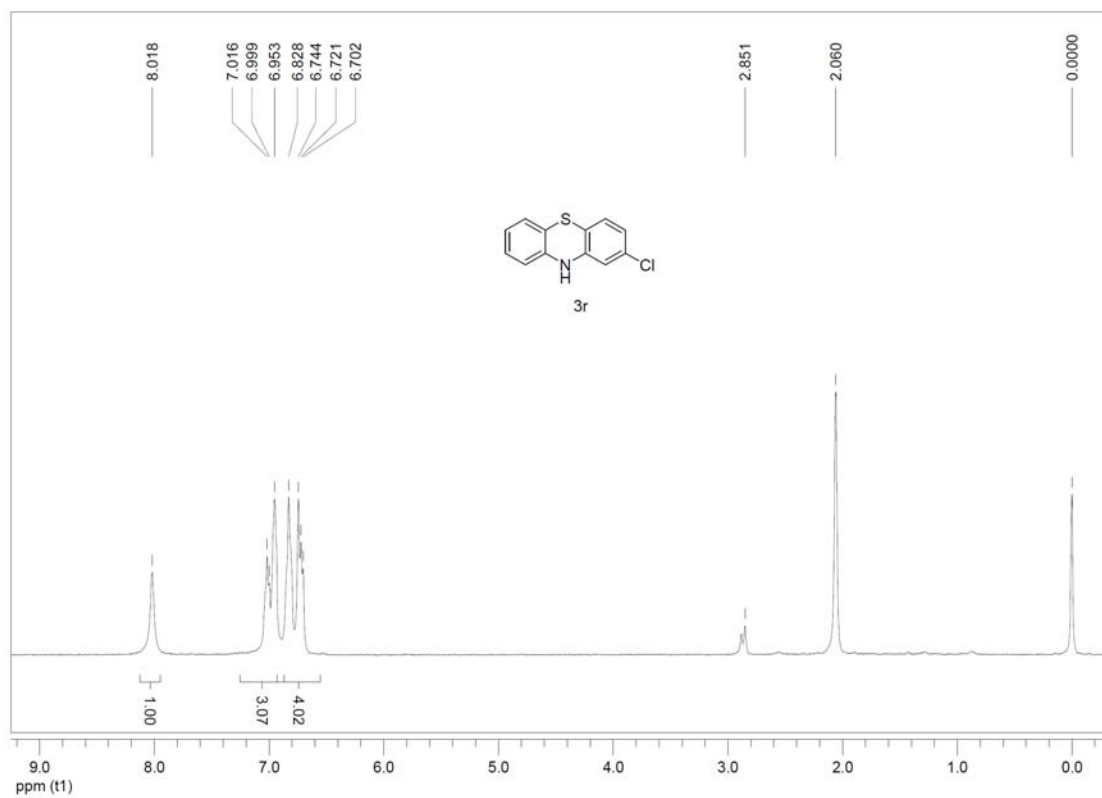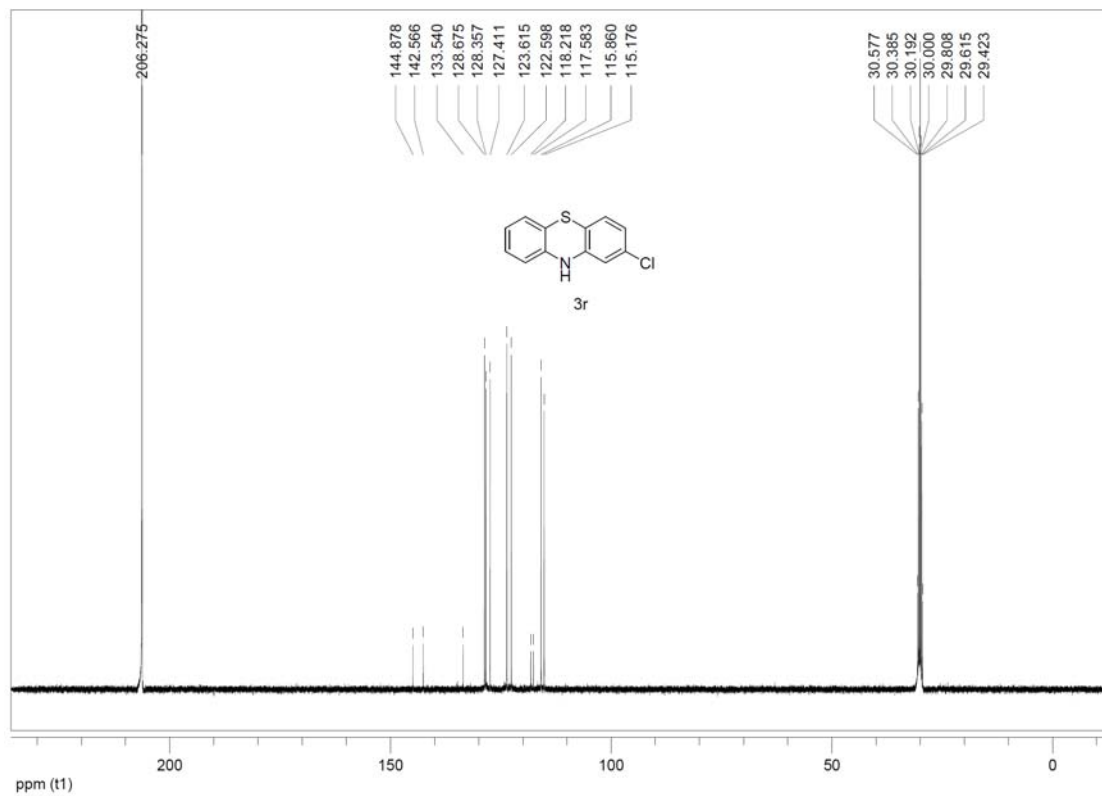

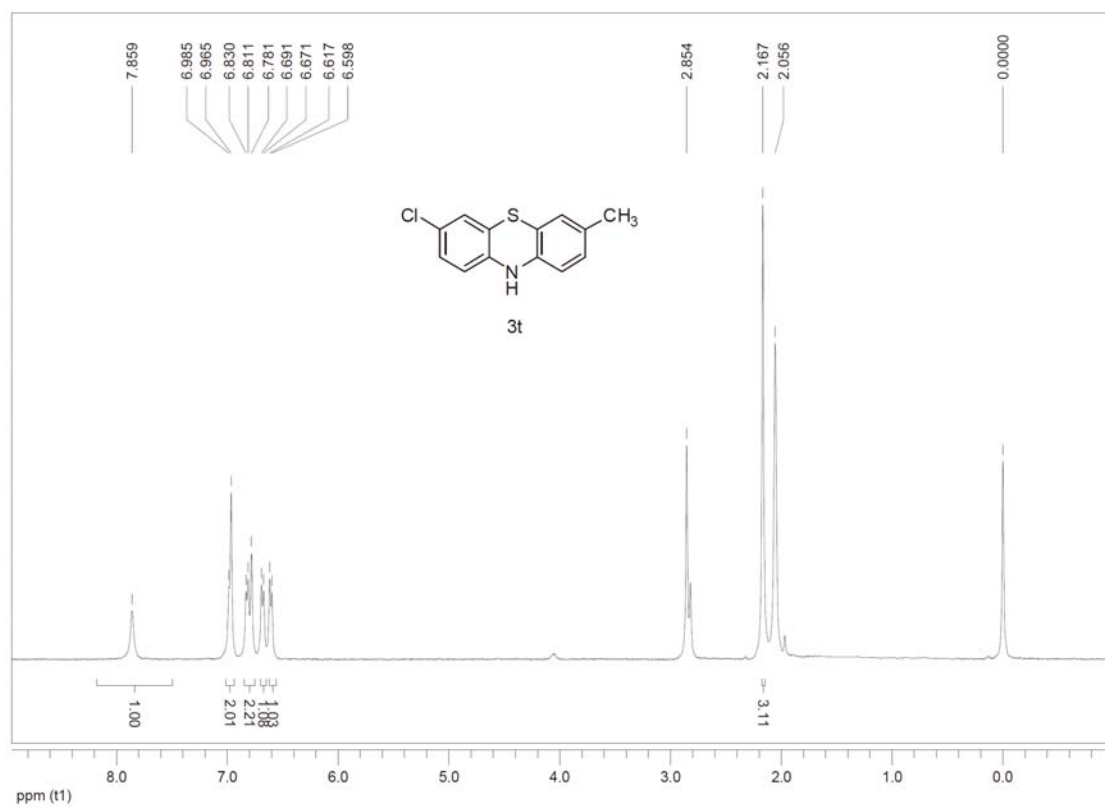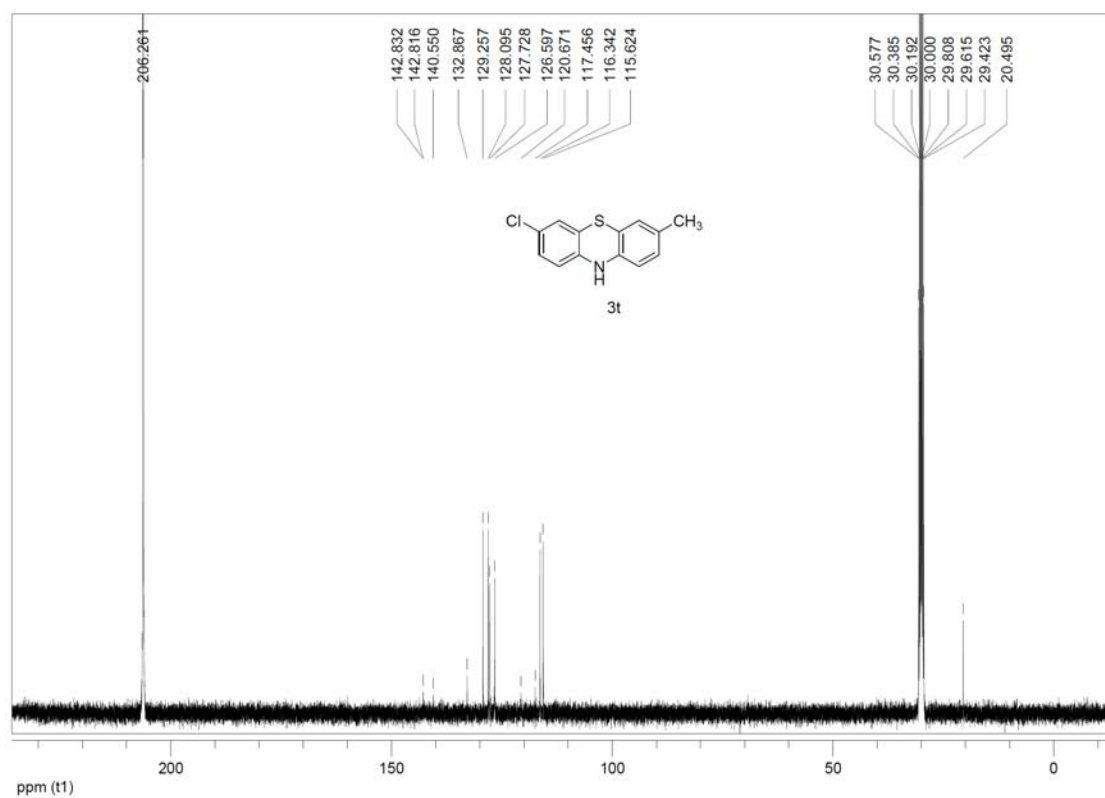

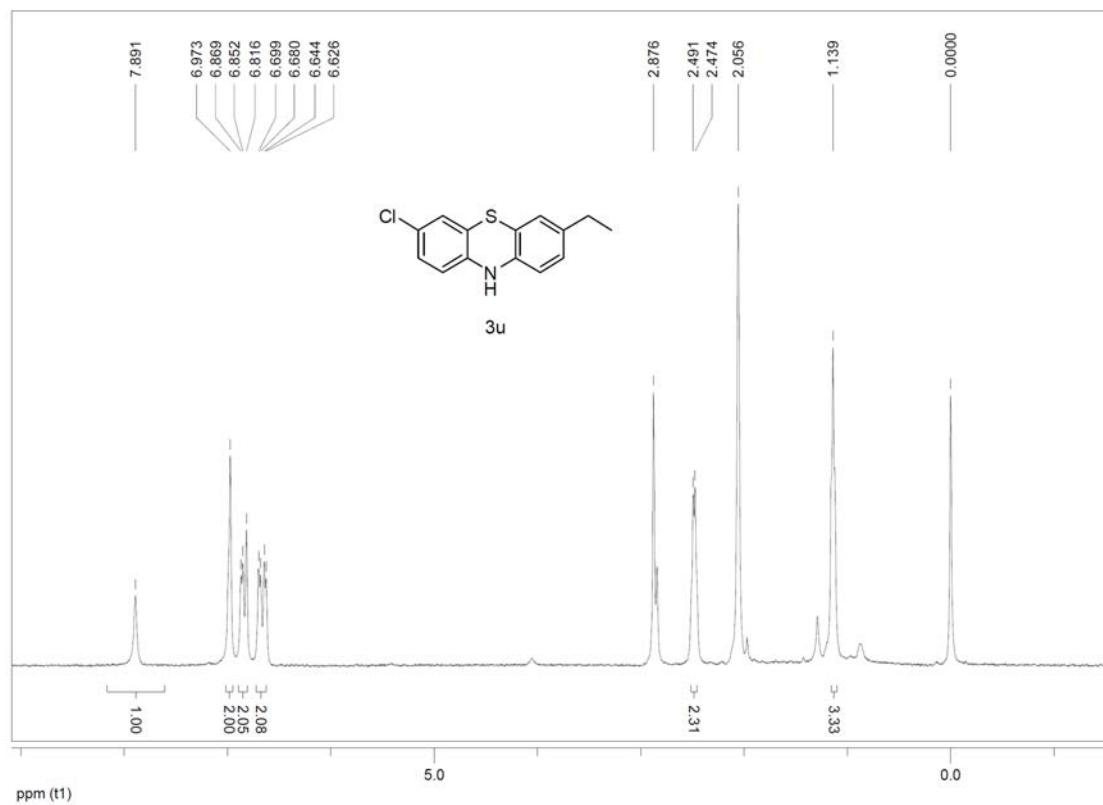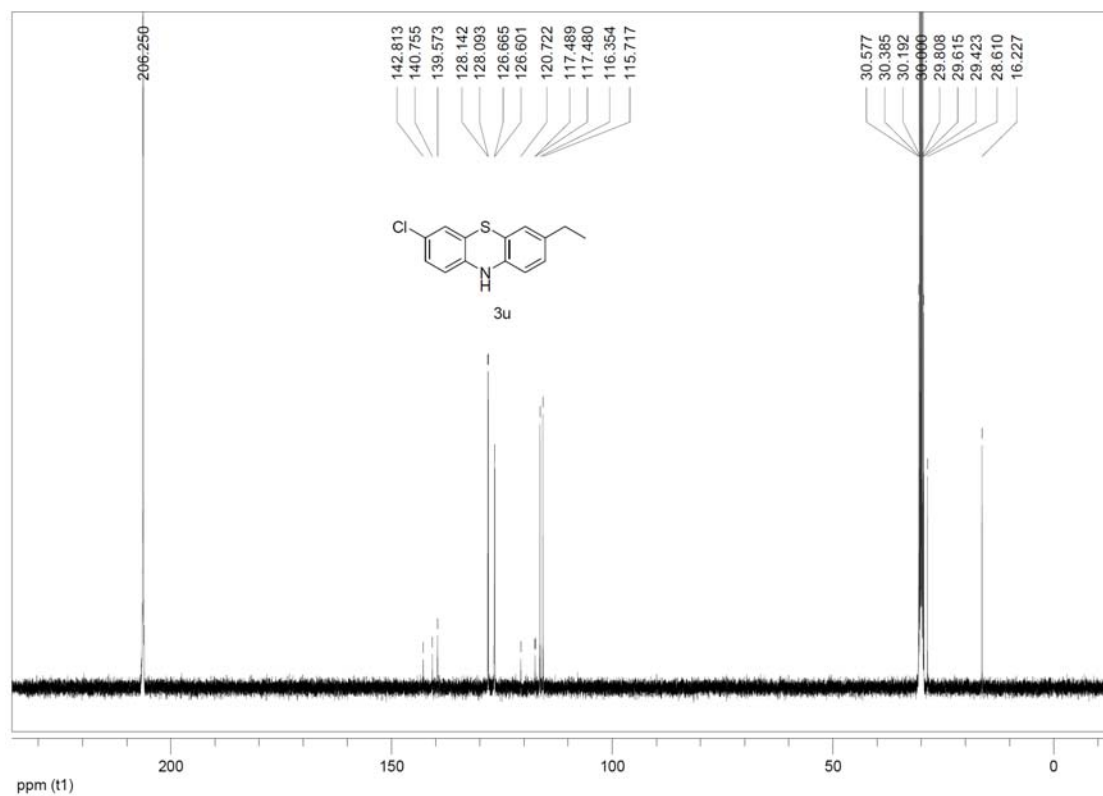

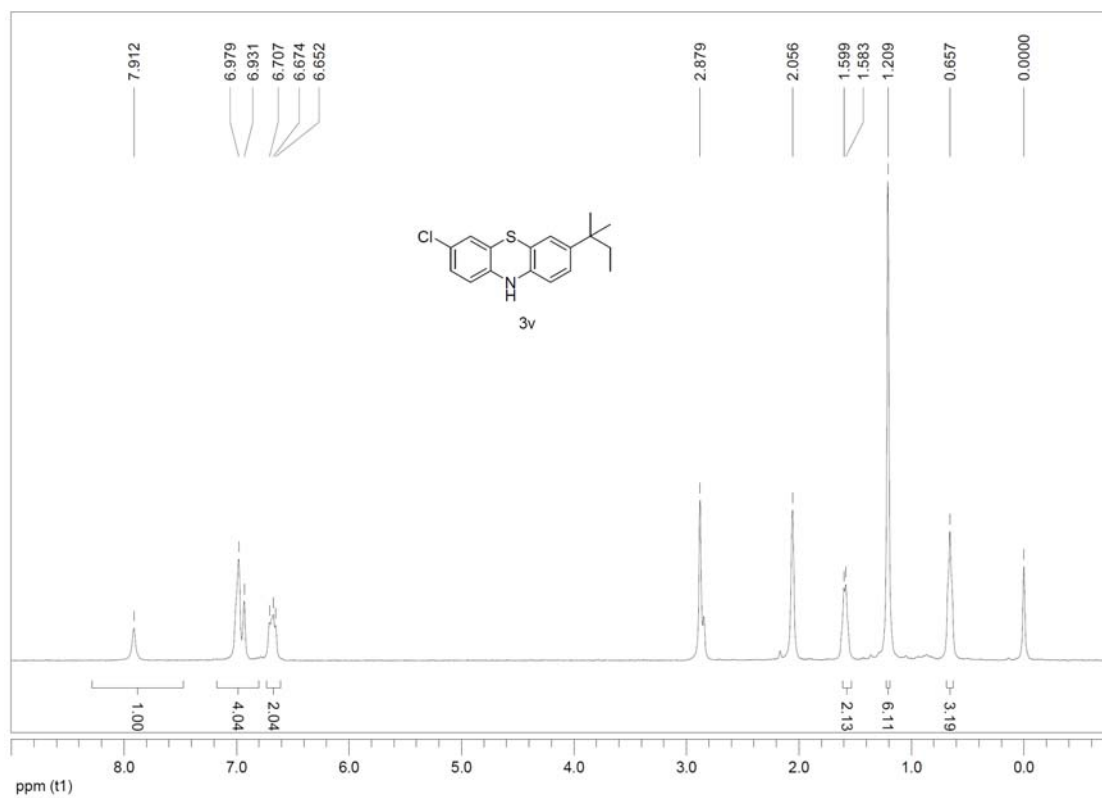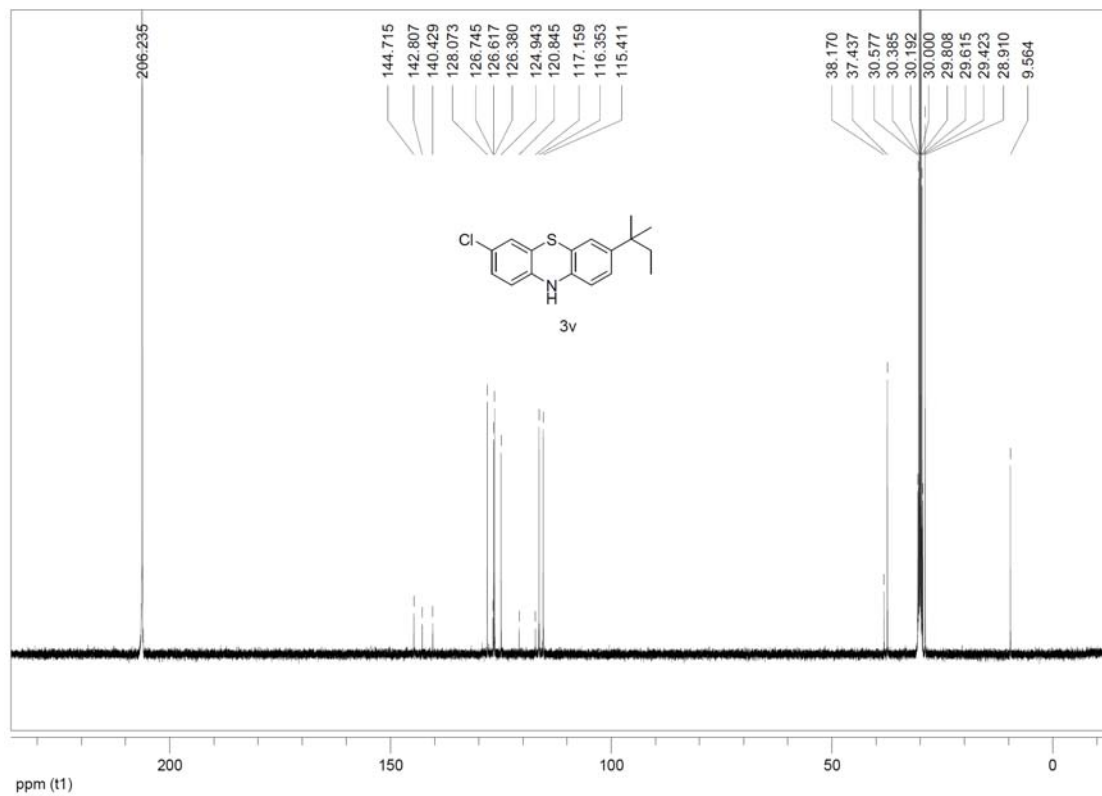

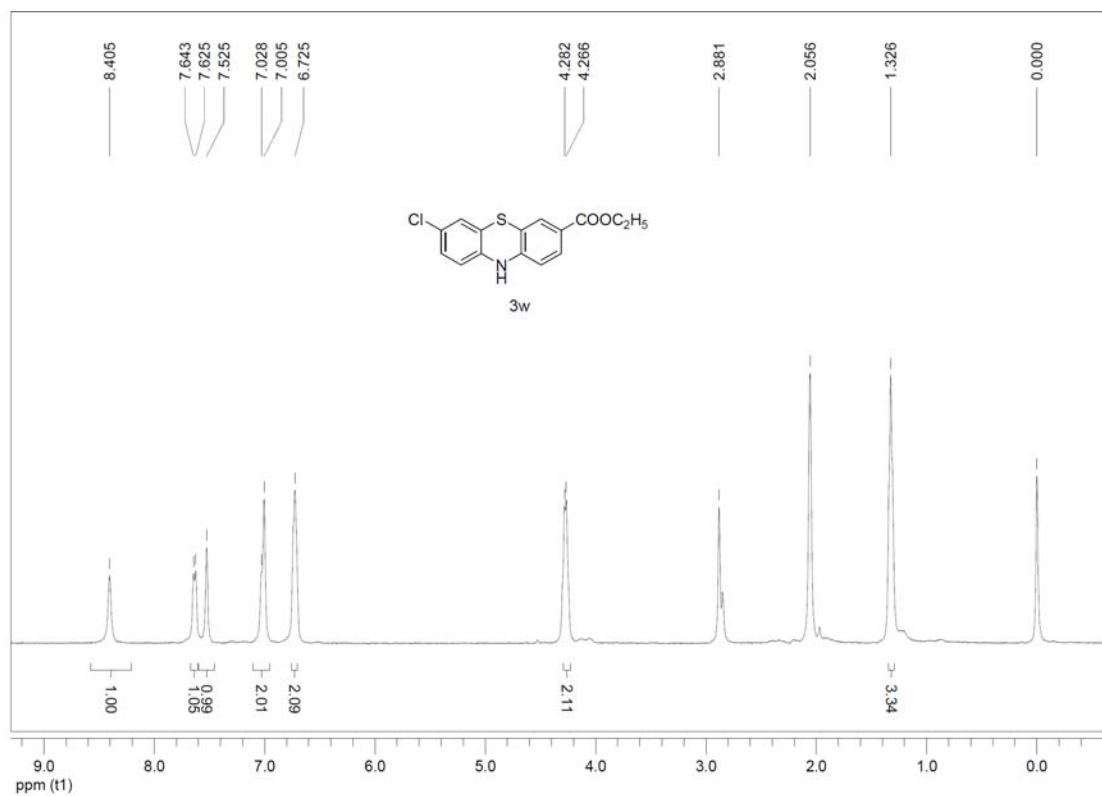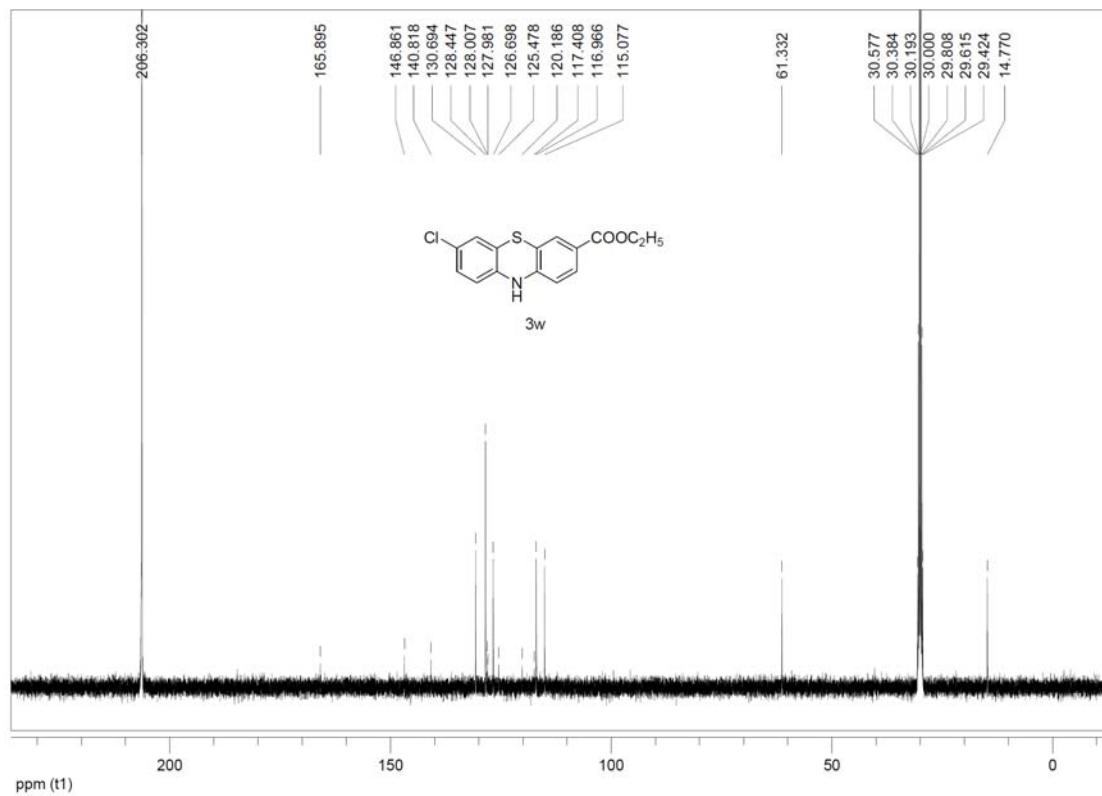

E:\チホヤニキ糖キヤ珪材マオチミ\882.gcd

采集日期和时间 : 2013-1-28 10:23:55  
 用户名 : Admin  
 样品瓶号 : 1  
 样品名称 :  
 样品 ID : 未知样  
 样品类型 :  
 进样量 :  
 内标量 :  
 数据名 : E:\廖云峰\吩噻嗪系列\882.gcd  
 方法文件名 : E:\20121025\250.gcm

GC analysis for 3h and 3h'

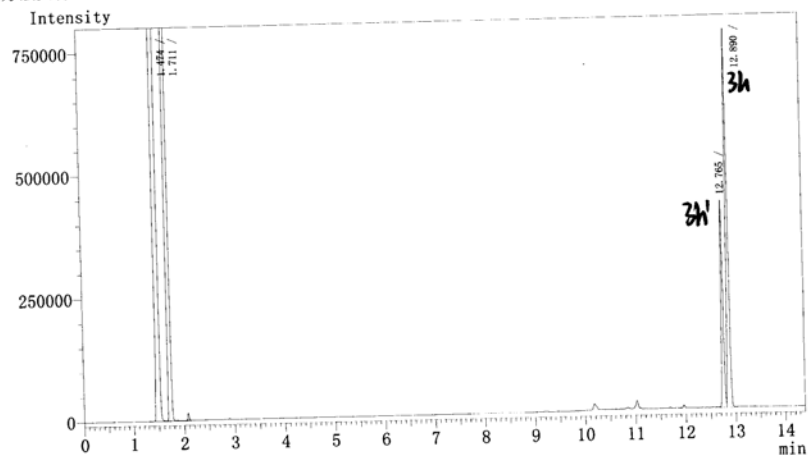

| 峰号 | 保留时间   | 面积        | 面积%     | 峰高        |
|----|--------|-----------|---------|-----------|
| 1  | 1.474  | 229359006 | 82.5355 | 156679875 |
| 2  | 1.711  | 45267813  | 16.2898 | 30650080  |
| 3  | 12.765 | 1100909   | 0.3962  | 418084    |
| 4  | 12.890 | 2163663   | 0.7786  | 758688    |
| 全部 |        | 277891391 | 00.0000 | 188506727 |

1:2
